# Supplementary material
Source: PubMed Central journal article supplement (PMC2928257)
Supplement: NIHMS220427-supplement-supplement_1.pdf [file NIHMS220427-supplement-supplement_1.pdf]

Supp. Table S1. Deleterious *BRCA1* and *BRCA2* mutations identified in 705 contralateral (CBC) and 1398 unilateral breast cancer patients (UBC).

| Gene  | Exon | NT <sup>1</sup> | Base Change  | AA Change   | BIC <sup>2</sup> | HGV <sup>3</sup> DNA | HGV protein | Type <sup>4</sup> | Total <sup>5</sup> | CBC | UBC |
|-------|------|-----------------|--------------|-------------|------------------|----------------------|-------------|-------------------|--------------------|-----|-----|
| BRCA1 | 2    | 185             | del AG       | Stop 39     | 185delAG         | c.68_69delAG         | p.Glu23fs   | F                 | 16                 | 12  | 4   |
| BRCA1 | 2    | 188             | ins AG       | Stop 31     | 188insAG         | c.68_69dupAG         | p.Cys24fs   | F                 | 2                  | 2   |     |
| BRCA1 | 3    | 202             | del TG       | Stop 39     | 202delTG         | c.83_84delTG         | p.Leu28fs   | F                 | 1                  | 1   |     |
| BRCA1 | 3    | 249             | T to A       | Cys to Ser  | C44S             | c.130T>A             | p.Cys44Ser  | M                 | 2                  | 2   |     |
| BRCA1 | 5    | 297             | del CA       | Stop 64     | 297delCA         | c.178_179delCA       | p.Gln60fs   | F                 | 1                  |     | 1   |
| BRCA1 | 5    | 300             | T to G       | Cys to Gly  | C61G             | c.181T>G             | p.Cys61Gly  | M                 | 10                 | 8   | 2   |
| BRCA1 | 5    | 330             | A to G       | Arg to Gly  | R71G             | c.211A>G             | p.Arg71Gly  | S                 | 1                  | 1   |     |
| BRCA1 | 7    | 421-2           | del A        | -           | IVS6-2delA       | c.302-2delA          |             | S                 | 1                  | 1   |     |
| BRCA1 | 7    | 546             | G to T       | Glu to Stop | E143X            | c.427G>T             | p.Glu143X   | N                 | 1                  |     | 1   |
| BRCA1 | 8    | 604             | del TG       | Stop 180    | 604delTG         | c.485_486delTG       | p.Val162fs  | F                 | 1                  | 1   |     |
| BRCA1 | 10   | 713-2           | A to C       | -           | IVS9-2A>C        | c.594-2A>C           |             | S                 | 1                  | 1   |     |
| BRCA1 | 11   | 1201            | del 11       | Stop 361    | 1201del11        | c.1082_1092del11     | p.Ser361X   | F                 | 1                  |     | 1   |
| BRCA1 | 11   | 1240            | del C        | Stop 375    | 1240delC         | c.1121delC           | p.Thr374fs  | F                 | 1                  | 1   |     |
| BRCA1 | 11   | 1623            | del TTAAA    | Stop 503    | 1623del5         | c.1504_1508del5      | p.Leu502fs  | F                 | 2                  | 1   | 1   |
| BRCA1 | 11   | 1648            | C to A       | Ser to Stop | S510X            | c.1529C>A            | p.Ser510X   | N                 | 1                  |     | 1   |
| BRCA1 | 11   | 1675            | del A        | Stop 531    | 1675delA         | c.1556delA           | p.Lys519fs  | F                 | 2                  | 2   |     |
| BRCA1 | 11   | 1806            | C to T       | Gln to Stop | Q563X            | c.1687C>T            | p.Gln563X   | N                 | 1                  | 1   |     |
| BRCA1 | 11   | 1921            | del 248      | Stop 603    | 1921del248       | c.1802_2049del248    | p.His601fs  | F                 | 1                  | 1   |     |
| BRCA1 | 11   | 2154            | A to T       | Lys to Stop | K679X            | c.2035A>T            | p.Lys679X   | N                 | 1                  | 1   |     |
| BRCA1 | 11   | 2433            | del G        | Stop 791    | 2433delG         | c.2314delG           | p.Val772fs  | F                 | 1                  |     | 1   |
| BRCA1 | 11   | 2508            | del G        | Stop 802    | 2508delG         | c.2389delG           | p.Glu797fs  | F                 | 1                  | 1   |     |
| BRCA1 | 11   | 2552            | del C        | Stop 814    | 2552delC         | c.2433delC           | p.Lys812fs  | F                 | 1                  |     | 1   |
| BRCA1 | 11   | 2594            | del C        | Stop 845    | 2594delC         | c.2475delC           | p.Asp825fs  | F                 | 3                  | 1   | 2   |
| BRCA1 | 11   | 2634            | del C        | Stop 845    | 2634delC         | c.2515delC           | p.His839fs  | F                 | 1                  | 1   |     |
| BRCA1 | 11   | 2754            | G to T       | Glu to Stop | E879X            | c.2635G>T            | p.Glu879X   | N                 | 1                  | 1   |     |
| BRCA1 | 11   | 2798            | del GAAA     | Stop 998    | 2798del4         | c.2679_2682delGAAA   | p.Lys893fs  | F                 | 1                  | 1   |     |
| BRCA1 | 11   | 2841            | G to T       | Glu to Stop | E908X            | c.2722G>T            | p.Glu908X   | N                 | 1                  | 1   |     |
| BRCA1 | 11   | 2983            | C to A       | Ser to Stop | S955X            | c.2864C>A            | p.Ser955X   | N                 | 1                  |     | 1   |
| BRCA1 | 11   | 3124            | del A        | Stop 1023   | 3124delA         | c.3005delA           | p.Asn1002fs | F                 | 1                  |     | 1   |
| BRCA1 | 11   | 3148            | del CT       | Stop 1016   | 3148delCT        | c.3029_3030delCT     | p.Pro1010fs | F                 | 1                  |     | 1   |
| BRCA1 | 11   | 3171            | ins TGAGA    | Stop 1025   | 3171ins5         | c.3048_3052dup5      | p.Asn1018fs | F                 | 1                  | 1   |     |
| BRCA1 | 11   | 3307            | del CC ins G | Stop 1063   | 3307delCCinsG    | c.3188_3189delCCinsG | p.Ser1063X  | F                 | 1                  |     | 1   |
| BRCA1 | 11   | 3347            | del AG       | Stop 1084   | 3347delAG        | c.3228_3229delAG     | p.Gly1077fs | F                 | 1                  | 1   |     |
| BRCA1 | 11   | 3438            | G to T       | Glu to Stop | E1107X           | c.3319G>T            | p.Glu1107fs | N                 | 2                  | 2   |     |
| BRCA1 | 11   | 3450            | del CAAG     | Stop 1115   | 3450del4         | c.3331_3334delCAAG   | p.Gln1111fs | F                 | 1                  | 1   |     |

| Gene  | Exon  | NT <sup>1</sup> | Base Change | AA Change   | BIC <sup>2</sup> | HGV <sup>3</sup> DNA | HGV protein  | Type <sup>4</sup> | Total <sup>5</sup> | CBC | UBC |
|-------|-------|-----------------|-------------|-------------|------------------|----------------------|--------------|-------------------|--------------------|-----|-----|
| BRCA1 | 11    | 3508            | C to G      | Ser to Stop | S1130X           | c.3389C>G            | p.Ser1130X   | N                 | 1                  |     | 1   |
| BRCA1 | 11    | 3600            | del 11      | Stop 1163   | 3600del11        | c.3481_3491del11     | p.Glu1161fs  | F                 | 2                  | 2   |     |
| BRCA1 | 11    | 3726            | C to T      | Arg to Stop | R1203X           | c.3607C>T            | p.Arg1203X   | N                 | 3                  | 1   | 2   |
| BRCA1 | 11    | 3829            | del T       | Stop 1263   | 3829delT         | c.3710delT           | p.Ile1237fs  | F                 | 1                  | 1   |     |
| BRCA1 | 11    | 3867            | G to T      | Glu to Stop | E1250X           | c.3748G>T            | p.Glu1250X   | N                 | 4                  | 2   | 2   |
| BRCA1 | 11    | 3875            | del GTCT    | Stop 1262   | 3875del4         | c.3756_3759delGTCT   | p.Ser1253fs  | F                 | 4                  | 4   |     |
| BRCA1 | 11    | 4184            | del TCAA    | Stop 1364   | 4184del4         | c.4065_4068delTCAA   | p.Asn1355fs  | F                 | 2                  |     | 2   |
| BRCA1 | 12    | 4302            | C to T      | Gln to Stop | Q1395X           | c.4183C>T            | p.Gln1395X   | N                 | 1                  | 1   |     |
| BRCA1 | 13    | 4341            | C to T      | Gln to Stop | Q1408X           | c.4222C>T            | p.Gln1408X   | N                 | 1                  |     | 1   |
| BRCA1 | 13    | 4370            | del GT      | Stop 1426   | 4370delGT        | c.4251_4252delGT     | p.Leu1418fs  | F                 | 1                  | 1   |     |
| BRCA1 | 13    | 4446            | C to T      | Arg to Stop | R1443X           | c.4327C>T            | p.Arg1443X   | N                 | 2                  | 1   | 1   |
| BRCA1 | 13    | 4476+1          | G to T      | -           | IVS13+1G>T       | c.4357+1G>T          |              | S                 | 2                  | 1   | 1   |
| BRCA1 | 16    | 5105+2          | T to C      | -           | IVS16+2T>C       | c.4986+2T>C          |              | S                 | 1                  | 1   |     |
| BRCA1 | 18    | 5214            | C>T         | Arg to Trp  | R1699W           | c.5095C>T            | p.Arg1699Trp | M                 | 1                  |     | 1   |
| BRCA1 | 18    | 5242            | C>A         | Ala to Glu  | A1708E           | c.5123C>A            | p.Ala1708Glu | M                 | 1                  | 1   |     |
| BRCA1 | 20    | 5332            | G to A      | Gly to Glu  | G1738E           | c.5213G>A            | p.Gly1738Glu | M                 | 1                  |     | 1   |
| BRCA1 | 20    | 5349            | del A       | Stop 1764   | 5349delA         | c.5230delA           | p.Arg1744fs  | F                 | 1                  | 1   |     |
| BRCA1 | 20    | 5382            | ins C       | Stop 1829   | 5382insC         | c.5266dupC           | p.Gln1756fs  | F                 | 10                 | 2   | 8   |
| BRCA1 | 21    | 5443            | T to G      | Met to Arg  | M1775R           | c.5324T>G            | p.Met1775Arg | M                 | 1                  |     | 1   |
| BRCA1 | 23    | 5563            | G to A      | Trp to Stop | W1815X           | c.5444G>A            | p.Trp1815X   | N                 | 1                  |     | 1   |
| BRCA1 | 24    | 5622            | C to T      | Arg to Stop | R1835X           | c.5503C>T            | p.Arg1835X   | N                 | 1                  |     | 1   |
| BRCA1 | 24    | 5677            | ins A       | Stop 1853   | 5677insA         | c.5558dupA           | p.Tyr1853X   | F                 | 1                  | 1   |     |
| BRCA1 | Total |                 |             |             |                  |                      |              |                   | 109                | 67  | 42  |
| BRCA2 | 2     | 231             | G to A      | Met to Ile  | M11              | c.3G>A               | p.Met1Ile    | M                 | 1                  |     | 1   |
| BRCA2 | 2     | 279             | del AC      | Stop 29     | 279delAC         | c.51_52delAC         | p.Arg18fs    | F                 | 1                  |     | 1   |
| BRCA2 | 4     | 592             | del A       | Stop 135    | 592delA          | c.364delA            | p.Thr122fs   | F                 | 1                  | 1   |     |
| BRCA2 | 5     | 697             | del AA      | Stop 181    | 697delAA         | c.469_470delAA       | p.Lys157fs   | F                 | 1                  |     | 1   |
| BRCA2 | 7     | 838             | del C       | Stop 210    | 838delC          | c.610delC            | p.Leu204fs   | F                 | 1                  | 1   |     |
| BRCA2 | 9     | 983             | del ACAG    | Stop 275    | 983del4          | c.755_758delACAG     | p.Asp252fs   | F                 | 2                  | 1   | 1   |
| BRCA2 | 10    | 1461            | ins A       | Stop 420    | 1461insA         | c.1233dupA           | p.Pro412fs   | F                 | 1                  |     | 1   |
| BRCA2 | 10    | 1538            | del AAGA    | Stop 458    | 1538del4         | c.1310_1313delAAGA   | p.Lys437fs   | F                 | 3                  | 3   |     |
| BRCA2 | 10    | 1898            | del 14      | Stop 557    | 1898del14        | c.1670_1683del14     | p.Leu557X    | F                 | 1                  | 1   |     |
| BRCA2 | 10    | 2034            | del A       | Stop 613    | 2034delA         | c.1813delA           | p.Ile605fs   | F                 | 1                  | 1   |     |
| BRCA2 | 10    | 2041            | ins A       | Stop 615    | 2041insA         | c.1813dupA           | p.Ile605fs   | F                 | 3                  | 2   | 1   |
| BRCA2 | 11    | 2482            | del GACT    | Stop 770    | 2482del4         | c.2254_2257delGACT   | p.Asp752fs   | F                 | 1                  | 1   |     |
| BRCA2 | 11    | 2600            | C to A      | Ser to Stop | S791X            | c.2372C>A            | p.Ser791X    | N                 | 1                  | 1   |     |

| Gene  | Exon | NT <sup>1</sup> | Base Change    | AA Change   | BIC <sup>2</sup> | HGV <sup>3</sup> DNA   | HGV protein | Type <sup>4</sup> | Total <sup>5</sup> | CBC | UBC |
|-------|------|-----------------|----------------|-------------|------------------|------------------------|-------------|-------------------|--------------------|-----|-----|
| BRCA2 | 11   | 3036            | del ACAA       | Stop 958    | 3036del4         | c.2808_2811delACAA     | p.Ala938fs  | F                 | 5                  | 4   | 1   |
| BRCA2 | 11   | 3058            | A to T         | Lys to Stop | K944X            | c.2830A>T              | p.Lys944X   | N                 | 1                  |     | 1   |
| BRCA2 | 11   | 3337            | C to T         | Gln to Stop | Q1037X           | c.3109C>T              | p.Gln1037X  | N                 | 1                  | 1   |     |
| BRCA2 | 11   | 3492            | ins T          | Stop 1098   | 3492insT         | c.3264dupT             | p.Gln1089fs | F                 | 1                  |     | 1   |
| BRCA2 | 11   | 3773            | del TT         | Stop 1182   | 3773delTT        | c.3545_3546delTT       | p.Phe1182X  | F                 | 1                  |     | 1   |
| BRCA2 | 11   | 3827            | del GT         | Stop 1200   | 3827delGT        | c.3599_3600delGT       | p.Cys1200X  | F                 | 1                  | 1   |     |
| BRCA2 | 11   | 4075            | del GT         | Stop 1284   | 4075delGT        | c.3847_3848delGT       | p.Val1283fs | F                 | 1                  | 1   |     |
| BRCA2 | 11   | 4093            | del AAAT       | Stop 1291   | 4093del4         | c.3865_3868delAAAT     | p.Lys1289fs | F                 | 1                  |     | 1   |
| BRCA2 | 11   | 4206            | ins TGCT       | Stop 1330   | 4206ins4         | c.3975_3978dupTTGC     | p.Ala1327fs | F                 | 1                  | 1   |     |
| BRCA2 | 11   | 4677            | del A          | Stop 1485   | 4677delA         | c.4449delA             | p.Asp1484fs | F                 | 1                  | 1   |     |
| BRCA2 | 11   | 5164            | del GAAA       | Stop 1668   | 5164del4         | c.4936_4939delGAAA     | p.Glu1646fs | F                 | 1                  | 1   |     |
| BRCA2 | 11   | 5804            | del TTAA       | Stop 1861   | 5804del4         | c.5576_5579delTTAA     | p.Ile1859fs | F                 | 1                  |     | 1   |
| BRCA2 | 11   | 5844            | del AGTAA      | Stop 1873   | 5844del5         | c.5616_5620del5        | p.Lys1872fs | F                 | 1                  |     | 1   |
| BRCA2 | 11   | 5873            | C to A         | Ser to Stop | S1882X           | c.5645C>A              | p.Ser1882X  | N                 | 1                  | 1   |     |
| BRCA2 | 11   | 5910            | C to G         | Tyr to Stop | Y1894X           | c.5682C>G              | p.Tyr1894X  | N                 | 1                  | 1   |     |
| BRCA2 | 11   | 5950            | del CT         | Stop 1909   | 5950delCT        | c.5722_5723delCT       | p.Leu1908fs | F                 | 2                  | 1   | 1   |
| BRCA2 | 11   | 6174            | del T          | Stop 2003   | 6174delT         | c.5946delT             | p.Ser1982fs | F                 | 5                  | 2   | 3   |
| BRCA2 | 11   | 6286            | G to T         | Glu to Stop | E2020X           | c.6058G>T              | p.Glu2020X  | N                 | 1                  |     | 1   |
| BRCA2 | 11   | 6503            | del TT         | Stop 2098   | 6503delTT        | c.6275_6276delTT       | p.Leu2092fs | F                 | 1                  |     | 1   |
| BRCA2 | 11   | 6633            | del CTTAA      | Stop 2137   | 6633del5         | c.6405_6409del5        | p.Asn2135fs | F                 | 1                  |     | 1   |
| BRCA2 | 11   | 6671            | del CT         | Stop 2149   | 6671delCT        | c.6443_6444delCT       | p.Ser2148fs | F                 | 1                  |     | 1   |
| BRCA2 | 11   | 6714            | del ACAA       | Stop 2166   | 6714del4         | c.6486_6489delACAA     | p.Lys2162fs | F                 | 1                  |     | 1   |
| BRCA2 | 11   | 6884            | C to G         | Ser to Stop | S2219X           | c.6656C>G              | p.Ser2219X  | N                 | 1                  |     | 1   |
| BRCA2 | 13   | 7169            | del C          | Stop 2315   | 7169delC         | c.6941delC             | p.Thr2314fs | F                 | 1                  |     | 1   |
| BRCA2 | 14   | 7253            | del AA         | Stop 2358   | 7253delAA        | c.7025_7026delAA       | p.Gln2342fs | F                 | 1                  | 1   |     |
| BRCA2 | 14   | 7295            | del TT         | Stop 2358   | 7295delTT        | c.7067_7068delTT       | p.Phe2356fs | F                 | 1                  |     | 1   |
| BRCA2 | 14   | 7297            | del CT         | Stop 2358   | 7297delCT        | c.7069_7070delCT       | p.Leu2357fs | F                 | 2                  | 1   | 1   |
| BRCA2 | 14   | 7438            | del 7 insTG    | Stop 2410   | 7438del7ins2     | c.7210_7216del7insTG   | p.Lys2404fs | F                 | 1                  |     | 1   |
| BRCA2 | 15   | 7786            | C to T         | Arg to Stop | R2520X           | c.7558C>T              | p.Arg2520X  | N                 | 1                  |     | 1   |
| BRCA2 | 16   | 7990            | del ATA ins TT | Stop 2647   | 7990del3ins2     | c.7762_7764delATAinsTT | p.Ile2588fs | F                 | 1                  | 1   |     |
| BRCA2 | 17   | 8141            | del TTCCT      | Stop 2638   | 8141del5         | c.7913_7917del5        | p.Phe2638X  | F                 | 1                  | 1   |     |
| BRCA2 | 18   | 8550            | ins T          | Stop 2781   | 8550insT         | c.8322dupT             | p.Met2775fs | F                 | 1                  | 1   |     |
| BRCA2 | 18   | 8558            | del A          | Stop 2820   | 8558delA         | c.8330delA             | p.Lys2777fs | F                 | 1                  | 1   |     |
| BRCA2 | 20   | 8803            | del C          | Stop 2862   | 8803delC         | c.8575delC             | p.Gln2859fs | F                 | 1                  | 1   |     |
| BRCA2 | 20   | 8823            | ins T          | Stop 2868   | 8823insT         | c.8594dupT             | p.Leu2865fs | F                 | 1                  | 1   |     |
| BRCA2 | 21   | 8958            | del T          | Stop 2926   | 8958delT         | c.8730delT             | p.Asn2910fs | F                 | 1                  | 1   |     |
| BRCA2 | 22   | 9181+1          | G to T         | -           | IVS22+1G>T       | c.8953+1G>T            |             | S                 | 1                  | 1   |     |

| Gene  | Exon  | NT <sup>1</sup> | Base Change | AA Change   | BIC <sup>2</sup> | HGV <sup>3</sup> DNA | HGV protein | Type <sup>4</sup> | Total <sup>5</sup> | CBC | UBC |    |
|-------|-------|-----------------|-------------|-------------|------------------|----------------------|-------------|-------------------|--------------------|-----|-----|----|
| BRCA2 | 23    | 9197            | G to A      | Trp to Stop | W2990X           | c.8969G>A            | p.Trp2990fs | N                 | 1                  |     | 1   |    |
| BRCA2 | 23    | 9326            | ins A       | Stop 3043   | 9326insA         | c.9097dupA           | p.Thr3033fs | F                 | 1                  | 1   |     |    |
| BRCA2 | 24    | 9481            | ins A       | Stop 3110   | 9481insA         | c.9253dupA           | p.Thr3085fs | F                 | 1                  | 1   |     |    |
| BRCA2 | 25    | 9610            | C to T      | Arg to Stop | R3128X           | c.9382C>T            | p.Arg3128X  | N                 | 1                  | 1   |     |    |
| BRCA2 | 25    | 9729+3          | A to T      | -           | IVS25+3A>T       | c.9501+3A>T          |             | S                 | 2                  |     | 2   |    |
| BRCA2 | 26    | 9769            | del 14      | Stop 3183   | 9769del14        | c.9541_9554del14     | p.Met3181fs | F                 | 1                  | 1   |     |    |
| BRCA2 | Total |                 |             |             |                  |                      |             |                   |                    | 72  | 41  | 31 |

<sup>1</sup> BRCA1: nucleotide number according to GenBank U14680.1. <http://www.ncbi.nlm.nih.gov/entrez/viewer.fcgi?db=nucleotide&val=555931>

<sup>1</sup> BRCA2: nucleotide number according to GenBank NM\_000059.1. <http://www.ncbi.nlm.nih.gov/entrez/viewer.fcgi?db=nucleotide&val=4502450>

<sup>2</sup> BIC (Breast Cancer Information Core). <http://research.nhgri.nih.gov/bic/>

<sup>3</sup> HGVS (Human Genome Variation Society). <http://www.hgvs.org/mutnomen/recs.html>

<sup>4</sup> Type: F=frame shift, M=missense, S=splice site, N=nonsense

<sup>5</sup> Number of observations

mutations not earlier described in BIC (by November 2008)

Supp. Table S2. *BRCA1* and *BRCA2* unclassified variants identified in 705 contralateral (CBC) and 1398 unilateral breast cancer patients (UBC).

| Gene  | Exon | NT <sup>1</sup> | Base Ch | AA Change  | BIC <sup>2</sup> | HGV <sup>3</sup> DNA | HGV protein | Type <sup>4</sup> | Total <sup>5</sup> | CBC | UBC |
|-------|------|-----------------|---------|------------|------------------|----------------------|-------------|-------------------|--------------------|-----|-----|
| BRCA1 | 2    | 101-10          | T to C  | -          | IVS1-10T>C       | c.-29T>C             |             | IVS               | 1                  | 1   | 0   |
| BRCA1 | 3    | 200-129         | G to A  | -          | IVS2-129G>A      | c.81-129G>A          |             | IVS               | 1                  | 0   | 1   |
| BRCA1 | 3    | 200-55          | T to G  | -          | IVS2-55T>G       | c.81-55T>G           |             | IVS               | 1                  | 0   | 1   |
| BRCA1 | 3    | 233             | G to A  | Lys to Lys | K38K             | c.114T>A             | p.=         | Syn               | 3                  | 3   | 0   |
| BRCA1 | 3    | 253             | A to C  | Lys to Thr | K45T             | c.134A>C             | p.Lys45Thr  | M                 | 1                  | 0   | 1   |
| BRCA1 | 5    | 254-53          | T to C  | -          | IVS4-53T>C       | c.135-53T>C          |             | IVS               | 1                  | 0   | 1   |
| BRCA1 | 5    | 254-23          | C to T  | -          | IVS4-23C>T       | c.135-23C>T          |             | IVS               | 1                  | 0   | 1   |
| BRCA1 | 5    | 331+23          | T to A  | -          | IVS5+23T>A       | c.212+23T>A          |             | IVS               | 4                  | 1   | 3   |
| BRCA1 | 7    | 421-70          | G to A  | -          | IVS6-70G>A       | c.302-70G>A          |             | IVS               | 1                  | 0   | 1   |
| BRCA1 | 7    | 433             | A to G  | Tyr to Cys | Y105C            | c.314A>G             | p.Tyr105Cys | M                 | 1                  | 0   | 1   |
| BRCA1 | 7    | 544             | C to A  | Pro to His | P142H            | c.425C>A             | p.Pro142His | M                 | 4                  | 2   | 2   |
| BRCA1 | 7    | 560+36          | del 14  | -          | IVS7+36del14     | c.441+36del14        |             | IVS               | 1154               | 377 | 777 |
| BRCA1 | 8    | 561-34          | C to T  | -          | IVS7-34C>T       | c.442-34C>T          |             | IVS               | 779                | 254 | 525 |
| BRCA1 | 8    | 628             | G to A  | Arg to Gln | R170Q            | c.509G>A             | p.Arg170Gln | M                 | 2                  | 1   | 1   |
| BRCA1 | 8    | 655             | A to G  | Tyr to Cys | Y179C            | c.536A>G             | p.Tyr179Cys | M                 | 2                  | 0   | 2   |
| BRCA1 | 9    | 667-80          | T>C     | -          | IVS8-80T>C       | c.548-80T>C          |             | IVS               | 5                  | 3   | 2   |
| BRCA1 | 9    | 667-58          | delT    | -          | IVS8-58delT      | c.548-58delT         |             | IVS               | 1044               | 342 | 702 |
| BRCA1 | 9    | 667-17          | G to T  | -          | IVS8-17G>T       | c.548-17G>T          |             | IVS               | 2                  | 1   | 1   |
| BRCA1 | 9    | 667-3           | del T   | -          | IVS8-3delT       | c.548-3delT          |             | IVS               | 1                  | 0   | 1   |
| BRCA1 | 9    | 710             | C to T  | Cys to Cys | C197C            | c.591C>T             | p.=         | Syn               | 3                  | 1   | 2   |
| BRCA1 | 10   | 713-72          | A>G     | -          | IVS9-72A>G       | c.594-72A>G          |             | IVS               | 1                  | 1   | 0   |
| BRCA1 | 10   | 713-34          | T to C  | -          | IVS9-34T>C       | c.594-34T>C          |             | IVS               | 1                  | 0   | 1   |
| BRCA1 | 10   | 760             | A to G  | Asp to Gly | D214G            | c.641A>G             | p.Asp214Gly | M                 | 1                  | 1   | 0   |
| BRCA1 | 11   | 812             | G to A  | Thr to Thr | T231T            | c.693G>A             | p.=         | Syn               | 1                  | 0   | 1   |
| BRCA1 | 11   | 855             | T to G  | Leu to Val | L246V            | c.736T>G             | p.Leu246Val | M                 | 3                  | 2   | 1   |
| BRCA1 | 11   | 944             | C to T  | Gly to Gly | G275G            | c.825C>T             | p.=         | Syn               | 1                  | 0   | 1   |
| BRCA1 | 11   | 1067            | C to G  | Ser to Arg | S316R            | c.948C>G             | p.Ser316Arg | M                 | 1                  | 0   | 1   |
| BRCA1 | 11   | 1100            | A to G  | Thr to Thr | T327T            | c.981A>G             | p.=         | Syn               | 4                  | 0   | 4   |
| BRCA1 | 11   | 1152            | G to T  | Asp to Tyr | D345Y            | c.1033G>T            | p.Asp345Tyr | M                 | 1                  | 1   | 0   |
| BRCA1 | 11   | 1184            | G to A  | Lys to Lys | K355K            | c.1065G>A            | p.=         | Syn               | 1                  | 0   | 1   |
| BRCA1 | 11   | 1186            | A to G  | Gln to Arg | Q356R            | c.1067A>G            | p.Gln356Arg | M                 | 251                | 81  | 170 |
| BRCA1 | 11   | 1224            | del GAT | del Asp    | D369del          | c.1105delGAT         | p.Asp369del | IFD               | 1                  | 0   | 1   |
| BRCA1 | 11   | 1256            | T to G  | Ile to Met | I379M            | c.1137T>G            | p.Ile379Met | M                 | 1                  | 0   | 1   |
| BRCA1 | 11   | 1575            | T to C  | Phe to Leu | F486L            | c.1456T>C            | p.Phe486Leu | M                 | 4                  | 1   | 3   |
| BRCA1 | 11   | 1605            | C to T  | Arg to Cys | R496C            | c.1486C>T            | p.Arg496Cys | M                 | 2                  | 1   | 1   |

| Gene  | Exon | NT <sup>1</sup> | Base Ch | AA Change   | BIC <sup>2</sup> | HGV <sup>3</sup> DNA | HGV protein  | Type <sup>4</sup> | Total <sup>5</sup> | CBC | UBC |
|-------|------|-----------------|---------|-------------|------------------|----------------------|--------------|-------------------|--------------------|-----|-----|
| BRCA1 | 11   | 1606            | G to A  | Arg to His  | R496H            | c.1487G>A            | p.Arg496His  | M                 | 4                  | 0   | 4   |
| BRCA1 | 11   | 1728            | A to G  | Asn to Asp  | N537D            | c.1609A>G            | p.Asn537Asp  | M                 | 1                  | 0   | 1   |
| BRCA1 | 11   | 1767            | A to C  | Asn to His  | N550H            | c.1648A>C            | p.Asn550His  | M                 | 3                  | 1   | 2   |
| BRCA1 | 11   | 1831            | T to C  | Ile to Thr  | I571T            | c.1712T>C            | p.Ile571Thr  | M                 | 1                  | 0   | 1   |
| BRCA1 | 11   | 1908            | G to A  | Glu to Lys  | E597K            | c.1789G>A            | p.Glu597Lys  | M                 | 3                  | 0   | 3   |
| BRCA1 | 11   | 1965            | del TCT | del Ser     | S616del          | c.1846delTCT         | p.Ser616del  | IFD               | 1                  | 0   | 1   |
| BRCA1 | 11   | 1984            | C to T  | Ala to Val  | A622V            | c.1865C>T            | p.Ala622Val  | M                 | 1                  | 1   | 0   |
| BRCA1 | 11   | 2030            | T to C  | Thr to Thr  | T637T            | c.1911T>C            | p.=          | Syn               | 1                  | 0   | 1   |
| BRCA1 | 11   | 2090            | A to G  | Gln to Gln  | Q657Q            | c.1971A>G            | p.=          | Syn               | 3                  | 0   | 3   |
| BRCA1 | 11   | 2196            | G to A  | Asp to Asn  | D693N            | c.2077G>A            | p.Asp693Asn  | M                 | 296                | 106 | 190 |
| BRCA1 | 11   | 2201            | C to T  | Ser to Ser  | S694S            | c.2082C>T            | p.=          | Syn               | 1040               | 337 | 703 |
| BRCA1 | 11   | 2418            | A to G  | Ser to Gly  | S767G            | c.2299A>G            | p.Ser767Gly  | M                 | 1                  | 0   | 1   |
| BRCA1 | 11   | 2430            | T to C  | Leu to Leu  | L771L            | c.2311T>C            | p.=          | Syn               | 987                | 321 | 666 |
| BRCA1 | 11   | 2471            | G to A  | Ser to Ser  | S784S            | c.2352G>A            | p.=          | Syn               | 1                  | 1   | 0   |
| BRCA1 | 11   | 2535            | G to A  | Ala to Thr  | A806T            | c.2416G>A            | p.Ala806Thr  | M                 | 1                  | 1   | 0   |
| BRCA1 | 11   | 2577            | A to G  | Lys to Glu  | K820E            | c.2458A>G            | p.Lys820Glu  | M                 | 5                  | 1   | 4   |
| BRCA1 | 11   | 2592            | G to T  | Asp to Tyr  | D825Y            | c.2473G>T            | p.Asp825Tyr  | M                 | 1                  | 1   | 0   |
| BRCA1 | 11   | 2596            | C to A  | Thr to Lys  | T826K            | c.2477C>A            | p.Thr826Lys  | M                 | 1                  | 0   | 1   |
| BRCA1 | 11   | 2602            | del GCT | del Gly 828 | G828del          | c.2483delGCT         | p.Gly828del  | IFD               | 1                  | 0   | 1   |
| BRCA1 | 11   | 2637            | A to G  | Ser to Gly  | S840G            | c.2518A>G            | p.Ser840Gly  | M                 | 1                  | 0   | 1   |
| BRCA1 | 11   | 2640            | C to T  | Arg to Trp  | R841W            | c.2521C>T            | p.Arg841Trp  | M                 | 8                  | 2   | 6   |
| BRCA1 | 11   | 2641            | G to A  | Arg to Gln  | R841Q            | c.2522G>A            | p.Arg841Gln  | M                 | 1                  | 0   | 1   |
| BRCA1 | 11   | 2685            | T to C  | Tyr to His  | Y856H            | c.2566T>C            | p.Tyr856His  | M                 | 1                  | 1   | 0   |
| BRCA1 | 11   | 2715            | C to T  | Arg to Cys  | R866C            | c.2596C>T            | p.Arg866Cys  | M                 | 1                  | 0   | 1   |
| BRCA1 | 11   | 2727            | G to C  | Ala to Pro  | A870P            | c.2608G>C            | p.Ala870Pro  | M                 | 1                  | 1   | 0   |
| BRCA1 | 11   | 2731            | C to T  | Pro to Leu  | P871L            | c.2612C>T            | p.Pro871Leu  | M                 | 1029               | 333 | 696 |
| BRCA1 | 11   | 2847            | C to G  | Gln to Glu  | Q910E            | c.2728C>G            | p.Gln910Glu  | M                 | 1                  | 0   | 1   |
| BRCA1 | 11   | 2852            | A to G  | Gly to Gly  | G911G            | c.2733A>G            | p.=          | Syn               | 5                  | 0   | 5   |
| BRCA1 | 11   | 2933            | A to G  | Pro to Pro  | P938P            | c.2814A>G            | p.=          | Syn               | 2                  | 0   | 2   |
| BRCA1 | 11   | 3003            | G to A  | Glu to Lys  | E962K            | c.2884G>A            | p.Glu962Lys  | M                 | 1                  | 0   | 1   |
| BRCA1 | 11   | 3119            | G to A  | Glu to Glu  | E1000E           | c.3000G>A            | p.=          | Syn               | 1                  | 1   | 0   |
| BRCA1 | 11   | 3143            | G to A  | Met to Ile  | M1008I           | c.3024G>A            | p.Met1008Ile | M                 | 4                  | 0   | 4   |
| BRCA1 | 11   | 3232            | A to G  | Glu to Gly  | E1038G           | c.3113A>G            | p.Glu1038Gly | M                 | 996                | 324 | 672 |
| BRCA1 | 11   | 3238            | G to A  | Ser to Asn  | S1040N           | c.3119G>A            | p.Ser1040Asn | M                 | 73                 | 28  | 45  |
| BRCA1 | 11   | 3340            | G to C  | Arg to Thr  | R1074T           | c.3221G>C            | p.Arg1074Thr | M                 | 1                  | 1   | 0   |
| BRCA1 | 11   | 3415            | C to T  | Pro to Leu  | P1099L           | c.3296C>T            | p.Pro1099Leu | M                 | 1                  | 0   | 1   |
| BRCA1 | 11   | 3421            | G to A  | Ser to Asn  | S1101N           | c.3302G>A            | p.Ser1101Asn | M                 | 2                  | 0   | 2   |
| BRCA1 | 11   | 3535            | G to T  | Ser to Ile  | S1139I           | c.3416G>T            | p.Ser1139Ile | M                 | 1                  | 1   | 0   |

| Gene  | Exon | NT <sup>1</sup> | Base Ch | AA Change  | BIC <sup>2</sup> | HGV <sup>3</sup> DNA | HGV protein  | Type <sup>4</sup> | Total <sup>5</sup> | CBC | UBC |
|-------|------|-----------------|---------|------------|------------------|----------------------|--------------|-------------------|--------------------|-----|-----|
| BRCA1 | 11   | 3537            | A to G  | Ser to Gly | S1140G           | c.3418A>G            | p.Ser1140Gly | M                 | 2                  | 0   | 2   |
| BRCA1 | 11   | 3573            | G to A  | Asp to Asn | D1152N           | c.3454G>A            | p.Asp1152Asn | M                 | 1                  | 0   | 1   |
| BRCA1 | 11   | 3667            | A to G  | Lys to Arg | K1183R           | c.3548A>G            | p.Lys1183Arg | M                 | 998                | 328 | 670 |
| BRCA1 | 11   | 3719            | G to C  | Gln to His | Q1200H           | c.3600G>C            | p.Gln1200His | M                 | 2                  | 2   | 0   |
| BRCA1 | 11   | 3727            | G to A  | Arg to Gln | R1203Q           | c.3608G>A            | p.Arg1203Gln | M                 | 1                  | 0   | 1   |
| BRCA1 | 11   | 3827            | T to G  | Asn to Lys | N1236K           | c.3708T>G            | p.Asn1236Lys | M                 | 1                  | 0   | 1   |
| BRCA1 | 11   | 3836            | T to A  | Ser to Ser | S1239S           | c.3717T>A            | p.=          | Syn               | 1                  | 1   | 0   |
| BRCA1 | 11   | 3864            | A to C  | Thr to Pro | T1249P           | c.3745A>C            | p.Thr1249Pro | M                 | 1                  | 0   | 1   |
| BRCA1 | 11   | 3916            | G to C  | Ser to Thr | S1266T           | c.3797G>C            | p.Ser1266Thr | M                 | 2                  | 1   | 1   |
| BRCA1 | 11   | 3942            | A to G  | Ile to Val | I1275V           | c.3823A>G            | p.Ile1275Val | M                 | 1                  | 0   | 1   |
| BRCA1 | 11   | 4158            | A to G  | Arg to Gly | R1347G           | c.4039A>G            | p.Arg1347Gly | M                 | 16                 | 5   | 11  |
| BRCA1 | 11   | 4166            | G to T  | Thr to Thr | T1349T           | c.4047G>T            | p.=          | Syn               | 1                  | 0   | 1   |
| BRCA1 | 11   | 4215+3          | A to G  | -          | IVS11+3A>G       | c.4096+3A>G          |              | IVS               | 1                  | 1   | 0   |
| BRCA1 | 11   | 4215+39         | T to C  | -          | IVS11+39T>C      | c.4096+39T>C         |              | IVS               | 1                  | 0   | 1   |
| BRCA1 | 12   | 4216-28         | A to G  | -          | IVS11-28A>G      | c.4097-28A>G         |              | IVS               | 1                  | 1   | 0   |
| BRCA1 | 12   | 4216-11         | T to C  | -          | IVS11-11T>C      | c.4097-11T>C         |              | IVS               | 1                  | 0   | 1   |
| BRCA1 | 12   | 4230            | G to C  | Gly to Arg | G1371R           | c.4111G>C            | p.Gly1371Arg | M                 | 1                  | 1   | 0   |
| BRCA1 | 12   | 4291            | T to C  | Ile to Thr | I1391T           | c.4172T>C            | p.Ile1391Thr | M                 | 1                  | 1   | 0   |
| BRCA1 | 12   | 4304+20         | del 18  | -          | IVS12+20del18    | c.4185+20del18       |              | IVS               | 1                  | 0   | 1   |
| BRCA1 | 12   | 4304+21         | del TG  | -          | IVS12+21delTG    | c.4185+21delTG       |              | IVS               | 1                  | 1   | 0   |
| BRCA1 | 12   | 4304+37         | del TG  | -          | IVS12+37delTG    | c.4185+37delTG       |              | IVS               | 2                  | 2   | 0   |
| BRCA1 | 13   | 4427            | C to T  | Ser to Ser | S1436S           | c.4308C>T            | p.=          | Syn               | 1005               | 323 | 682 |
| BRCA1 | 13   | 4476+17         | A to G  | -          | IVS13+17A>G      | c.4357+17A>G         |              | IVS               | 1                  | 0   | 1   |
| BRCA1 | 14   | 4477-37         | G to A  | -          | IVS13-37G>A      | c.4358-37G>A         |              | IVS               | 1                  | 1   | 0   |
| BRCA1 | 14   | 4477-28         | T to C  | -          | IVS13-28T>C      | c.4358-28T>C         |              | IVS               | 1                  | 1   | 0   |
| BRCA1 | 14   | 4477-10         | C to T  | -          | IVS13-10C>T      | c.4358-10C>T         |              | IVS               | 2                  | 1   | 1   |
| BRCA1 | 14   | 4529            | A to T  | Glu to Asp | E1470D           | c.4410A>T            | p.Glu1470Asp | M                 | 1                  | 0   | 1   |
| BRCA1 | 14   | 4603+14         | A to G  | -          | IVS14+14A>G      | c.4484+14A>G         |              | IVS               | 2                  | 0   | 2   |
| BRCA1 | 14   | 4603+61         | G to T  | -          | IVS14+61G>T      | c.4484+61G>T         |              | IVS               | 1                  | 0   | 1   |
| BRCA1 | 15   | 4654            | G to T  | Ser to Ile | S1512I           | c.4535G>T            | p.Ser1512Ile | M                 | 18                 | 3   | 15  |
| BRCA1 | 15   | 4755            | G to A  | Asp to Asn | D1546N           | c.4636G>A            | p.Asp1546Asn | M                 | 2                  | 0   | 2   |
| BRCA1 | 16   | 4869            | G to T  | Ala to Ser | A1584S           | c.4750G>T            | p.Ala1584Ser | M                 | 1                  | 1   | 0   |
| BRCA1 | 16   | 4890            | G to A  | Gly to Ser | G1591S           | c.4771G>A            | p.Gly1591Ser | M                 | 1                  | 1   | 0   |
| BRCA1 | 16   | 4931            | A to G  | Gln to Gln | Q1604Q           | c.4812A>G            | p.=          | Syn               | 7                  | 2   | 5   |
| BRCA1 | 16   | 4956            | A to G  | Ser to Gly | S1613G           | c.4837A>G            | p.Ser1613Gly | M                 | 1069               | 348 | 721 |
| BRCA1 | 16   | 5002            | T to C  | Met to Thr | M1628T           | c.4883T>C            | p.Met1628Thr | M                 | 1                  | 0   | 1   |
| BRCA1 | 16   | 5075            | G to A  | Met to Ile | M1652I           | c.4956G>A            | p.Met1652Ile | M                 | 61                 | 18  | 43  |
| BRCA1 | 17   | 5106-20         | A to G  | -          | IVS16-20A>G      | c.4987-20A>G         |              | IVS               | 1                  | 0   | 1   |



| Gene  | Exon | NT <sup>1</sup> | Base Ch | AA Change  | BIC <sup>2</sup> | HGV <sup>3</sup> DNA | HGV protein  | Type <sup>4</sup> | Total <sup>5</sup> | CBC | UBC |
|-------|------|-----------------|---------|------------|------------------|----------------------|--------------|-------------------|--------------------|-----|-----|
| BRCA1 | 17   | 5124            | G to T  | Ala to Ser | A1669S           | c.5005G>T            | p.Ala1669Ser | M                 | 1                  | 0   | 1   |
| BRCA1 | 18   | 5194-53         | C to T  | -          | IVS17-53C>T      | c.5075C>T            |              | IVS               | 114                | 31  | 83  |
| BRCA1 | 20   | 5313-43         | T to C  | -          | IVS19-43T>C      | c.5194-43T>C         |              | IVS               | 1                  | 0   | 1   |
| BRCA1 | 20   | 5396+60         | ins 12  | -          | IVS20+60ins12    | c.5277+60ins12       |              | IVS               | 11                 | 2   | 9   |
| BRCA1 | 20   | 5396+78         | G to A  | -          | IVS20+78G>A      | c.5277+78G>A         |              | IVS               | 8                  | 4   | 4   |
| BRCA1 | 20   | 5396+102        | A to G  | -          | IVS20+102A>G     | c.5277+102A>G        |              | IVS               | 1                  | 0   | 1   |
| BRCA1 | 21   | 5451+78         | C to T  | -          | IVS21+78C>T      | c.5332+78C>T         |              | IVS               | 2                  | 1   | 1   |
| BRCA1 | 21   | 5451+81         | T to C  | -          | IVS21+81T>C      | c.5332+81T>C         |              | IVS               | 1                  | 1   | 0   |
| BRCA1 | 22   | 5520            | G to T  | Gly to Cys | G1801C           | c.5401G>T            | p.Gly1801Cys | M                 | 1                  | 0   | 1   |
| BRCA1 | 22   | 5525+33         | A to T  | -          | IVS22+33A>T      | c.5406+33A>T         |              | IVS               | 2                  | 0   | 2   |
| BRCA1 | 22   | 5525+68         | T to C  | -          | IVS22+68T>C      | c.5406+68T>C         |              | IVS               | 6                  | 2   | 4   |
| BRCA1 | 23   | 5530            | T to A  | Val to Asp | V1804D           | c.5411T>A            | p.Val1804Asp | M                 | 1                  | 0   | 1   |
| BRCA1 | 24   | .5587-10        | C to A  | -          | IVS23-10C>A      | c.5468-10C>A         |              | IVS               | 1                  | 0   | 1   |
| BRCA1 | 24   | .5587-8         | G to T  | -          | IVS23-8G>T       | c.5468-8G>T          |              | IVS               | 1                  | 0   | 1   |
| BRCA1 | 24   | 5688            | C to G  | Gln to Glu | Q1857E           | c.5569C>G            | p.Gln1857Glu | M                 | 1                  | 1   | 0   |
| BRCA1 | 24   | 5747            | C to G  | -          | UGA+36C>G        | c.*36C>G             |              | UTR               | 5                  | 1   | 4   |
| BRCA1 | 24   | 5807            | C to T  | -          | UGA+96C>T        | c.*96C>T             |              | UTR               | 1                  | 1   | 0   |
| BRCA2 | 2    | 203             | G to A  | -          | 203G>A           | c.-26G>A             |              | UTR               | 797                | 269 | 528 |
| BRCA2 | 2    | 218             | C to T  | -          | 218C>T           | c.-11C>T             |              | UTR               | 1                  | 0   | 1   |
| BRCA2 | 2    | 295+62          | T to G  | -          | IVS2+62T>G       | c.67+62T>G           |              | IVS               | 13                 | 6   | 7   |
| BRCA2 | 3    | 296-31          | A to G  | -          | IVS2-31A>G       | c.68-31A>G           |              | IVS               | 1                  | 0   | 1   |
| BRCA2 | 3    | 296-7           | T to A  | -          | IVS2-7T>A        | c.68-7T>A            |              | IVS               | 10                 | 1   | 9   |
| BRCA2 | 3    | 353             | A to G  | Tyr to Cys | Y42C             | c.125A>G             | p.Tyr42Cys   | M                 | 11                 | 3   | 8   |
| BRCA2 | 3    | 407             | A to G  | Asn to Ser | N60S             | c.179A>G             | p.Asn60Ser   | M                 | 1                  | 1   | 0   |
| BRCA2 | 3    | 451             | G to C  | Ala to Pro | A75P             | c.223G>C             | p.Ala75Pro   | M                 | 2                  | 2   | 0   |
| BRCA2 | 3    | 495             | G to A  | Pro to Pro | P89P             | c.267G>A             | p.=          | Syn               | 1                  | 1   | 0   |
| BRCA2 | 4    | 545-37          | insTATG | -          | IVS3-37insTATG   | c.317-37insTATG      |              | IVS               | 1                  | 1   | 0   |
| BRCA2 | 4    | 653+33          | A to G  | -          | IVS4+33A>G       | c.425+33A>G          |              | IVS               | 1                  | 1   | 0   |
| BRCA2 | 5    | 654-37          | T to A  | -          | IVS4-37T>A       | c.426-37T>A          |              | IVS               | 1                  | 0   | 1   |
| BRCA2 | 5    | 661             | del GTT | del Val    | V145del          | c.433delGTT          | p.Val145del  | IFD               | 1                  | 1   | 0   |
| BRCA2 | 5    | 683             | C to A  | Thr to Lys | T152K            | c.455C>A             | p.Thr152Lys  | M                 | 1                  | 0   | 1   |
| BRCA2 | 5    | 695             | A to G  | Asp to Gly | D156G            | c.467A>G             | p.Asp156Gly  | M                 | 1                  | 1   | 0   |
| BRCA2 | 6    | 744+21          | A to T  | -          | IVS6+21A>T       | c.516+21A>T          |              | IVS               | 4                  | 1   | 3   |
| BRCA2 | 6    | 744+54          | T to C  | -          | IVS6+54T>C       | c.516+54T>C          |              | IVS               | 3                  | 2   | 1   |
| BRCA2 | 6    | 744+58          | G to A  | -          | IVS6+58G>A       | c.516+58G>A          |              | IVS               | 1                  | 0   | 1   |
| BRCA2 | 7    | 745-19          | C to T  | -          | IVS6-19C>T       | c.517-19C>T          |              | IVS               | 1                  | 1   | 0   |
| BRCA2 | 7    | 823             | G to A  | Ala to Thr | A199T            | c.595G>A             | p.Ala199Thr  | M                 | 2                  | 1   | 1   |



| Gene  | Exon | NT <sup>1</sup> | Base Ch | AA Change  | BIC <sup>2</sup> | HGV <sup>3</sup> DNA | HGV protein | Type <sup>4</sup> | Total <sup>5</sup> | CBC | UBC |
|-------|------|-----------------|---------|------------|------------------|----------------------|-------------|-------------------|--------------------|-----|-----|
| BRCA2 | 7    | 859+25          | C to T  | -          | IVS7+25C>T       | c.631+25C>T          |             | IVS               | 4                  | 2   | 2   |
| BRCA2 | 8    | 860-69          | T to C  | -          | IVS7-69T>C       | c.632-69T>C          |             | IVS               | 6                  | 2   | 4   |
| BRCA2 | 8    | 860-64          | G to A  | -          | IVS7-64G>A       | c.632-64G>A          |             | IVS               | 1                  | 0   | 1   |
| BRCA2 | 8    | 860-27          | C to G  | -          | IVS7-27C>G       | c.632-27C>G          |             | IVS               | 1                  | 0   | 1   |
| BRCA2 | 9    | 910-32          | A to G  | -          | IVS8-32A>G       | c.682-32A>G          |             | IVS               | 2                  | 1   | 1   |
| BRCA2 | 9    | 910-12          | del TA  | -          | IVS8-12delTA     | c.682-12delTA        |             | IVS               | 1                  | 1   | 0   |
| BRCA2 | 9    | 997             | A to C  | Asn to His | N257H            | c.769A>C             | p.Asn257His | M                 | 1                  | 1   | 0   |
| BRCA2 | 10   | 1093            | A to C  | Asn to His | N289H            | c.865A>C             | p.Asn289His | M                 | 148                | 51  | 97  |
| BRCA2 | 10   | 1184            | A to G  | Asn to Ser | N319S            | c.956A>G             | p.Asn319Ser | M                 | 1                  | 0   | 1   |
| BRCA2 | 10   | 1192            | A to C  | Lys to Gln | K322Q            | c.964A>C             | p.Lys322Gln | M                 | 1                  | 0   | 1   |
| BRCA2 | 10   | 1206            | C to A  | Ser to Arg | S326R            | c.978C>A             | p.Ser326Arg | M                 | 5                  | 1   | 4   |
| BRCA2 | 10   | 1261            | A to G  | Lys to Glu | K345E            | c.1033A>G            | p.Lys345Glu | M                 | 1                  | 0   | 1   |
| BRCA2 | 10   | 1268            | A to G  | Gln to Arg | Q347R            | c.1040A>G            | p.Gln347Arg | M                 | 1                  | 1   | 0   |
| BRCA2 | 10   | 1342            | A to C  | Asn to His | N372H            | c.1114A>C            | p.Asn372His | M                 | 1022               | 360 | 662 |
| BRCA2 | 10   | 1379            | C to T  | Ser to Phe | S384F            | c.1151C>T            | p.Ser384Phe | M                 | 5                  | 2   | 3   |
| BRCA2 | 10   | 1395            | G to A  | Pro to Pro | P389P            | c.1167G>A            | p.=         | Syn               | 1                  | 1   | 0   |
| BRCA2 | 10   | 1460            | T to C  | Ile to Thr | I411T            | c.1232T>C            | p.Ile411Thr | M                 | 1                  | 0   | 1   |
| BRCA2 | 10   | 1503            | A to G  | Glu to Glu | E425E            | c.1275A>G            | p.=         | Syn               | 1                  | 1   | 0   |
| BRCA2 | 10   | 1590            | A to G  | Lys to Lys | K454K            | c.1362A>G            | p.=         | Syn               | 3                  | 0   | 3   |
| BRCA2 | 10   | 1593            | A to G  | Ser to Ser | S455S            | c.1365A>G            | p.=         | Syn               | 146                | 51  | 95  |
| BRCA2 | 10   | 1613            | A to G  | Glu to Gly | E462G            | c.1385A>G            | p.Glu462Gly | M                 | 1                  | 0   | 1   |
| BRCA2 | 10   | 1675            | G to C  | Ala to Pro | A483P            | c.1447G>C            | p.Ala483Pro | M                 | 1                  | 0   | 1   |
| BRCA2 | 10   | 1688            | C to A  | Ala to Glu | A487E            | c.1460C>A            | p.Ala487Glu | M                 | 3                  | 0   | 3   |
| BRCA2 | 10   | 1694            | C to G  | Ser to Cys | S489C            | c.1466C>G            | p.Ser489Cys | M                 | 3                  | 0   | 3   |
| BRCA2 | 10   | 1700            | C to G  | Thr to Ser | T491S            | c.1472C>G            | p.Thr491Ser | M                 | 1                  | 0   | 1   |
| BRCA2 | 10   | 1742            | T to C  | Ile to Thr | I505T            | c.1514T>C            | p.Ile505Thr | M                 | 2                  | 0   | 2   |
| BRCA2 | 10   | 2014            | G to C  | Asp to His | D596H            | c.1786G>C            | p.Asp596His | M                 | 3                  | 2   | 1   |
| BRCA2 | 10   | 2016            | T to C  | Asp to Asp | D596D            | c.1788T>C            | p.=         | Syn               | 4                  | 3   | 1   |
| BRCA2 | 10   | 2020            | A to G  | Thr to Ala | T598A            | c.1792A>G            | p.Thr598Ala | M                 | 11                 | 5   | 6   |
| BRCA2 | 10   | 2032            | G to A  | Gly to Arg | G602R            | c.1804G>A            | p.Gly602Arg | M                 | 1                  | 1   | 0   |
| BRCA2 | 10   | 2046            | G to A  | Pro to Pro | P606P            | c.1818G>A            | p.=         | Syn               | 1                  | 0   | 1   |
| BRCA2 | 10   | 2117            | C to T  | Thr to Ile | T630I            | c.1889C>T            | p.Thr630Ile | M                 | 1                  | 0   | 1   |
| BRCA2 | 10   | 2137+23         | ins T   | -          | IVS10+23insT     | c.1909+23insT        |             | IVS               | 5                  | 0   | 5   |
| BRCA2 | 11   | 2139            | T to C  | Gly to Gly | G637G            | c.1911T>C            | p.=         | Syn               | 2                  | 1   | 1   |
| BRCA2 | 11   | 2166            | C to T  | Ser to Ser | S646S            | c.1938C>T            | p.=         | Syn               | 6                  | 1   | 5   |
| BRCA2 | 11   | 2192            | C to G  | Pro to Arg | P655R            | c.1964C>G            | p.Pro655Arg | M                 | 7                  | 2   | 5   |
| BRCA2 | 11   | 2310            | T to C  | Asn to Asn | N694N            | c.2082T>C            | p.=         | Syn               | 1                  | 1   | 0   |
| BRCA2 | 11   | 2457            | T to C  | His to His | H743H            | c.2229T>C            | p.=         | Syn               | 144                | 49  | 95  |

| Gene  | Exon | NT <sup>1</sup> | Base Ch | AA Change  | BIC <sup>2</sup> | HGV <sup>3</sup> DNA | HGV protein  | Type <sup>4</sup> | Total <sup>5</sup> | CBC | UBC |
|-------|------|-----------------|---------|------------|------------------|----------------------|--------------|-------------------|--------------------|-----|-----|
| BRCA2 | 11   | 2578            | A to G  | Met to Val | M784V            | c.2350A>G            | p.Met784Val  | M                 | 2                  | 0   | 2   |
| BRCA2 | 11   | 2640            | A to G  | Glu to Glu | E804E            | c.2412A>G            | p.=          | Syn               | 1                  | 1   | 0   |
| BRCA2 | 11   | 2778            | A to G  | Gln to Gln | Q850Q            | c.2550A>G            | p.=          | Syn               | 1                  | 0   | 1   |
| BRCA2 | 11   | 2937            | A to G  | Leu to Leu | L903L            | c.2709A>G            | p.=          | Syn               | 1                  | 0   | 1   |
| BRCA2 | 11   | 3031            | G to A  | Asp to Asn | D935N            | c.2803G>A            | p.Asp935Asn  | M                 | 1                  | 1   | 0   |
| BRCA2 | 11   | 3069            | G to T  | Leu to Phe | L947F            | c.2841G>T            | p.Leu947Phe  | M                 | 1                  | 1   | 0   |
| BRCA2 | 11   | 3111            | G to A  | Gln to Gln | Q961Q            | c.2883G>A            | p.=          | Syn               | 4                  | 1   | 3   |
| BRCA2 | 11   | 3147            | G to A  | Ser to Ser | S973S            | c.2919G>A            | p.=          | Syn               | 1                  | 0   | 1   |
| BRCA2 | 11   | 3185            | A to G  | Asn to Ser | N986S            | c.2957A>G            | p.Asn986Ser  | M                 | 1                  | 1   | 0   |
| BRCA2 | 11   | 3191            | A to C  | Asp to Ala | D988A            | c.2963A>C            | p.Asp988Ala  | M                 | 1                  | 1   | 0   |
| BRCA2 | 11   | 3199            | A to G  | Asn to Asp | N991D            | c.2971A>G            | p.Asn991Asp  | M                 | 148                | 51  | 97  |
| BRCA2 | 11   | 3283            | C to G  | Leu to Val | L1019V           | c.3055C>G            | p.Leu1019Val | M                 | 1                  | 0   | 1   |
| BRCA2 | 11   | 3414            | T to C  | Pro to Pro | P1062P           | c.3186T>C            | p.=          | Syn               | 1                  | 0   | 1   |
| BRCA2 | 11   | 3444            | A to G  | Leu to Leu | L1072L           | c.3216A>G            | p.=          | Syn               | 1                  | 0   | 1   |
| BRCA2 | 11   | 3492            | T to C  | Pro to Pro | P1088P           | c.3264T>C            | p.=          | Syn               | 4                  | 0   | 4   |
| BRCA2 | 11   | 3624            | A to G  | Lys to Lys | K1132K           | c.3396A>G            | p.=          | Syn               | 926                | 318 | 608 |
| BRCA2 | 11   | 3645            | G to A  | Lys to Lys | K1139K           | c.3417G>A            | p.=          | Syn               | 1                  | 0   | 1   |
| BRCA2 | 11   | 3648            | T to C  | Ser to Ser | S1140S           | c.3420T>C            | p.=          | Syn               | 2                  | 0   | 2   |
| BRCA2 | 11   | 3744            | G to A  | Ser to Ser | S1172S           | c.3516G>A            | p.=          | Syn               | 4                  | 0   | 4   |
| BRCA2 | 11   | 3945            | A to G  | Lys to Lys | K1239K           | c.3717A>G            | p.=          | Syn               | 1                  | 1   | 0   |
| BRCA2 | 11   | 4035            | T to C  | Val to Val | V1269V           | c.3807T>C            | p.=          | Syn               | 651                | 212 | 439 |
| BRCA2 | 11   | 4042            | A to G  | Met to Val | M1272V           | c.3814A>G            | p.Met1272Val | M                 | 1                  | 0   | 1   |
| BRCA2 | 11   | 4062            | T to C  | His to His | H1278H           | c.3834T>C            | p.=          | Syn               | 1                  | 0   | 1   |
| BRCA2 | 11   | 4076            | T to C  | Val to Ala | V1283A           | c.3848T>C            | p.Val1283Ala | M                 | 1                  | 1   | 0   |
| BRCA2 | 11   | 4097            | G to A  | Cys to Tyr | C1290Y           | c.3869G>A            | p.Cys1290Tyr | M                 | 4                  | 1   | 3   |
| BRCA2 | 11   | 4144            | G to A  | Val to Ile | V1306I           | c.3916G>A            | p.Val1306Ile | M                 | 1                  | 1   | 0   |
| BRCA2 | 11   | 4289            | C to T  | Thr to Met | T1354M           | c.4061C>T            | p.Thr1354Met | M                 | 2                  | 1   | 1   |
| BRCA2 | 11   | 4296            | G to A  | Leu to Leu | L1356L           | c.4068G>A            | p.=          | Syn               | 15                 | 6   | 9   |
| BRCA2 | 11   | 4318            | A to C  | Ile to Leu | I1364L           | c.4090A>C            | p.Ile1364Leu | M                 | 2                  | 0   | 2   |
| BRCA2 | 11   | 4415            | A to G  | Gln to Arg | Q1396R           | c.4187A>G            | p.Gln1396Arg | M                 | 1                  | 1   | 0   |
| BRCA2 | 11   | 4452            | G to A  | Gln to Gln | Q1408Q           | c.4224G>A            | p.=          | Syn               | 1                  | 1   | 0   |
| BRCA2 | 11   | 4469            | C to T  | Thr to Met | T1414M           | c.4241C>T            | p.Thr1414Met | M                 | 1                  | 0   | 1   |
| BRCA2 | 11   | 4486            | G to T  | Asp to Tyr | D1420Y           | c.4258G>T            | p.Asp1420Tyr | M                 | 31                 | 6   | 25  |
| BRCA2 | 11   | 4587            | A to G  | Lys to Lys | K1453K           | c.4359A>G            | p.=          | Syn               | 1                  | 0   | 1   |
| BRCA2 | 11   | 4664            | G to C  | Ser to Thr | S1479T           | c.4436G>C            | p.Ser1479Thr | M                 | 2                  | 0   | 2   |
| BRCA2 | 11   | 4789            | C to T  | Leu to Leu | L1521L           | c.4561C>T            | p.=          | Syn               | 1                  | 1   | 0   |
| BRCA2 | 11   | 4791            | G to A  | Leu to Leu | L1521L           | c.4563G>A            | p.=          | Syn               | 5                  | 2   | 3   |
| BRCA2 | 11   | 4813            | G to A  | Gly to Arg | G1529R           | c.4585G>A            | p.Gly1529Arg | M                 | 2                  | 2   | 0   |

| Gene  | Exon | NT <sup>1</sup> | Base Ch | AA Change  | BIC <sup>2</sup> | HGV <sup>3</sup> DNA | HGV protein  | Type <sup>4</sup> | Total <sup>5</sup> | CBC | UBC |
|-------|------|-----------------|---------|------------|------------------|----------------------|--------------|-------------------|--------------------|-----|-----|
| BRCA2 | 11   | 4842            | T to C  | Ser to Ser | S1538S           | c.4614T>C            | p.=          | Syn               | 1                  | 0   | 1   |
| BRCA2 | 11   | 4909            | C to A  | His to Asn | H1561N           | c.4681C>A            | p.His1561Asn | M                 | 2                  | 1   | 1   |
| BRCA2 | 11   | 4995            | A to G  | Pro to Pro | P1589P           | c.4767A>G            | p.=          | Syn               | 1                  | 1   | 0   |
| BRCA2 | 11   | 5042            | T to C  | Val to Ala | V1605A           | c.4814T>C            | p.Val1605Ala | M                 | 1                  | 0   | 1   |
| BRCA2 | 11   | 5058            | G to A  | Val to Val | V1610V           | c.4830G>A            | p.=          | Syn               | 1                  | 1   | 0   |
| BRCA2 | 11   | 5093            | G to C  | Arg to Thr | R1622T           | c.4865G>C            | p.Arg1622Thr | M                 | 1                  | 0   | 1   |
| BRCA2 | 11   | 5155            | G to A  | Val to Ile | V1643I           | c.4927G>A            | p.Val1643Ile | M                 | 1                  | 1   | 0   |
| BRCA2 | 11   | 5248            | A to G  | Ser to Gly | S1674G           | c.5020A>G            | p.Ser1674Gly | M                 | 1                  | 1   | 0   |
| BRCA2 | 11   | 5279            | C to G  | Thr to Ser | T1684S           | c.5051C>G            | p.Thr1684Ser | M                 | 1                  | 0   | 1   |
| BRCA2 | 11   | 5419            | C to T  | His to Tyr | H1731Y           | c.5191C>T            | p.His1731Tyr | M                 | 1                  | 0   | 1   |
| BRCA2 | 11   | 5426            | C to T  | Ser to Phe | S1733F           | c.5198C>T            | p.Ser1733Phe | M                 | 1                  | 1   | 0   |
| BRCA2 | 11   | 5427            | C to T  | Ser to Ser | S1733S           | c.5199C>T            | p.=          | Syn               | 18                 | 5   | 13  |
| BRCA2 | 11   | 5547            | G to A  | Glu to Glu | E1773E           | c.5319G>A            | p.=          | Syn               | 1                  | 0   | 1   |
| BRCA2 | 11   | 5606            | A to G  | Asn to Ser | N1793S           | c.5378A>G            | p.Asn1793Ser | M                 | 1                  | 0   | 1   |
| BRCA2 | 11   | 5646            | A to G  | Glu to Glu | E1806E           | c.5418A>G            | p.=          | Syn               | 3                  | 0   | 3   |
| BRCA2 | 11   | 5723            | C to A  | Ser to Tyr | S1832Y           | c.5495C>A            | p.Ser1832Tyr | M                 | 1                  | 0   | 1   |
| BRCA2 | 11   | 5806            | A to G  | Lys to Glu | K1860E           | c.5578A>G            | p.Lys1860Glu | M                 | 1                  | 0   | 1   |
| BRCA2 | 11   | 5862            | C to G  | Asn to Lys | N1878K           | c.5634C>G            | p.Asn1878Lys | M                 | 2                  | 2   | 0   |
| BRCA2 | 11   | 5863            | G to A  | Glu to Lys | E1879K           | c.5635G>A            | p.Glu1879Lys | M                 | 1                  | 1   | 0   |
| BRCA2 | 11   | 5868            | T to G  | Asn to Lys | N1880K           | c.5640T>G            | p.Asn1880Lys | M                 | 3                  | 2   | 1   |
| BRCA2 | 11   | 5887            | A to G  | Thr to Ala | T1887A           | c.5659A>G            | p.Thr1887Ala | M                 | 1                  | 0   | 1   |
| BRCA2 | 11   | 5896            | A to G  | Met to Val | M1890V           | c.5668A>G            | p.Met1890Val | M                 | 1                  | 0   | 1   |
| BRCA2 | 11   | 5911            | G to A  | Glu to Lys | E1895K           | c.5683G>A            | p.Glu1895Lys | M                 | 1                  | 0   | 1   |
| BRCA2 | 11   | 5932            | G to A  | Asp to Asn | D1902N           | c.5704G>A            | p.Asp1902Asn | M                 | 1                  | 0   | 1   |
| BRCA2 | 11   | 5972            | C to T  | Thr to Met | T1915M           | c.5744C>T            | p.Thr1915Met | M                 | 108                | 30  | 78  |
| BRCA2 | 11   | 5996            | A to C  | Asp to Ala | D1923A           | c.5768A>C            | p.Asp1923Ala | M                 | 1                  | 0   | 1   |
| BRCA2 | 11   | 6013            | A to G  | Ile to Val | I1929V           | c.5785A>G            | p.Ile1929Val | M                 | 1                  | 0   | 1   |
| BRCA2 | 11   | 6107            | G to A  | Cys to Tyr | C1960Y           | c.5879G>A            | p.Cys1960Tyr | M                 | 1                  | 1   | 0   |
| BRCA2 | 11   | 6172            | A to G  | Ser to Gly | S1982G           | c.5944A>G            | p.Ser1982Gly | M                 | 1                  | 0   | 1   |
| BRCA2 | 11   | 6328            | C to T  | Arg to Cys | R2034C           | c.6100C>T            | p.Arg2034Cys | M                 | 21                 | 6   | 15  |
| BRCA2 | 11   | 6347            | T to A  | Ile to Lys | I2040K           | c.6119T>A            | p.Ile2040Lys | M                 | 1                  | 1   | 0   |
| BRCA2 | 11   | 6545            | T to C  | Leu to Pro | L2106P           | c.6317T>C            | p.Leu2106Pro | M                 | 1                  | 0   | 1   |
| BRCA2 | 11   | 6550            | C to T  | Arg to Cys | R2108C           | c.6322C>T            | p.Arg2108Cys | M                 | 2                  | 1   | 1   |
| BRCA2 | 11   | 6551            | G to A  | Arg to His | R2108H           | c.6323G>A            | p.Arg2108His | M                 | 7                  | 2   | 5   |
| BRCA2 | 11   | 6575            | A to G  | His to Arg | H2116R           | c.6347A>G            | p.His2116Arg | M                 | 2                  | 1   | 1   |
| BRCA2 | 11   | 6640            | G to T  | Val to Phe | V2138F           | c.6412G>T            | p.Val2138Phe | M                 | 2                  | 1   | 1   |
| BRCA2 | 11   | 6683            | C to A  | Ser to Tyr | S2152Y           | c.6455C>A            | p.Ser2152Tyr | M                 | 1                  | 0   | 1   |
| BRCA2 | 11   | 6693            | C to T  | Leu to Leu | L2155L           | c.6465C>T            | p.=          | Syn               | 1                  | 1   | 0   |

| Gene  | Exon | NT <sup>1</sup> | Base Ch | AA Change  | BIC <sup>2</sup> | HGV <sup>3</sup> DNA | HGV protein  | Type <sup>4</sup> | Total <sup>5</sup> | CBC | UBC |
|-------|------|-----------------|---------|------------|------------------|----------------------|--------------|-------------------|--------------------|-----|-----|
| BRCA2 | 11   | 6717            | A to G  | Gln to Gln | Q2163Q           | c.6489A>G            | p.=          | Syn               | 1                  | 1   | 0   |
| BRCA2 | 11   | 6741            | C to G  | Val to Val | V2171V           | c.6513C>G            | p.=          | Syn               | 4                  | 2   | 2   |
| BRCA2 | 11   | 6841            | G to A  | Val to Met | V2205M           | c.6613G>A            | p.Val2205Met | M                 | 1                  | 0   | 1   |
| BRCA2 | 11   | 6976            | A to G  | Thr to Ala | T2250A           | c.6748A>G            | p.Thr2250Ala | M                 | 2                  | 1   | 1   |
| BRCA2 | 11   | 7049            | G to T  | Gly to Val | G2274V           | c.6821G>T            | p.Gly2274Val | M                 | 1                  | 0   | 1   |
| BRCA2 | 11   | 7069+11         | A to G  | -          | IVS11+11A>G      | c.6841+11A>G         |              | IVS               | 1                  | 0   | 1   |
| BRCA2 | 11   | 7069+33         | A to G  | -          | IVS11+33A>G      | c.6841+33A>G         |              | IVS               | 1                  | 1   | 0   |
| BRCA2 | 11   | 7069+36         | A to G  | -          | IVS11+36A>G      | c.6841+36A>G         |              | IVS               | 1                  | 1   | 0   |
| BRCA2 | 12   | 7070-73         | T to A  | -          | IVS11-73T>A      | c.6842-73T>A         |              | IVS               | 1                  | 1   | 0   |
| BRCA2 | 12   | 7070-22         | T to A  | -          | IVS11-22T>A      | c.6842-22T>A         |              | IVS               | 1                  | 1   | 0   |
| BRCA2 | 12   | 7081            | A to G  | Ile to Val | I2285V           | c.6853A>G            | p.Ile2285Val | M                 | 4                  | 0   | 4   |
| BRCA2 | 12   | 7149            | A to G  | Ser to Ser | S2307S           | c.6921A>G            | p.=          | Syn               | 1                  | 0   | 1   |
| BRCA2 | 13   | 7171            | A to C  | Ile to Leu | I2315L           | c.6943A>C            | p.Ile2315Leu | M                 | 1                  | 0   | 1   |
| BRCA2 | 13   | 7235+4          | A to G  | -          | IVS13+4A>G       | c.7007+4A>G          |              | IVS               | 1                  | 0   | 1   |
| BRCA2 | 13   | 7235+52         | C to A  | -          | IVS13+52C>A      | c.7007+52C>A         |              | IVS               | 1                  | 0   | 1   |
| BRCA2 | 14   | 7236-62         | A to G  | -          | IVS13-62A>G      | c.7008-62A>G         |              | IVS               | 1                  | 1   | 0   |
| BRCA2 | 14   | 7245            | G to C  | Lys to Asn | K2339N           | c.7017G>C            | p.Lys2339Asn | M                 | 2                  | 0   | 2   |
| BRCA2 | 14   | 7275            | T to A  | Phe to Leu | F2349L           | c.7047T>A            | p.Phe2349Leu | M                 | 1                  | 1   | 0   |
| BRCA2 | 14   | 7280            | C to G  | Ala to Gly | A2351G           | c.7052C>G            | p.Ala2351Gly | M                 | 1                  | 1   | 0   |
| BRCA2 | 14   | 7285            | G to C  | Gly to Arg | G2353R           | c.7057G>C            | p.Gly2353Arg | M                 | 1                  | 1   | 0   |
| BRCA2 | 14   | 7378            | C to A  | Gln to Lys | Q2384K           | c.7150C>A            | p.Gln2384Lys | M                 | 1                  | 0   | 1   |
| BRCA2 | 14   | 7460            | A to C  | Lys to Thr | K2411T           | c.7232A>C            | p.Lys2411Thr | M                 | 1                  | 0   | 1   |
| BRCA2 | 14   | 7470            | A to G  | Ser to Ser | S2414S           | c.7242A>G            | p.=          | Syn               | 743                | 245 | 498 |
| BRCA2 | 14   | 7547            | A to G  | His to Arg | H2440R           | c.7319A>G            | p.His2440Arg | M                 | 3                  | 1   | 2   |
| BRCA2 | 14   | 7625            | C to T  | Ala to Val | A2466V           | c.7397C>T            | p.Ala2466Val | M                 | 3                  | 1   | 2   |
| BRCA2 | 14   | 7641            | A to G  | Thr to Thr | T2471T           | c.7413A>G            | p.=          | Syn               | 1                  | 0   | 1   |
| BRCA2 | 14   | 7663+5          | T to C  | -          | IVS14+5T>C       | c.7435+5T>C          |              | IVS               | 1                  | 0   | 1   |
| BRCA2 | 14   | 7663+23         | A to G  | -          | IVS14+23A>G      | c.7435+23A>G         |              | IVS               | 1                  | 0   | 1   |
| BRCA2 | 14   | 7663+53         | C to T  | -          | IVS14+53C>T      | c.7435+53C>T         |              | IVS               | 2                  | 2   | 0   |
| BRCA2 | 15   | 7697            | T to C  | Ile to Thr | I2490T           | c.7469T>C            | p.Ile2490Thr | M                 | 11                 | 5   | 6   |
| BRCA2 | 15   | 7778            | C to G  | Thr to Ser | T2517S           | c.7550C>G            | p.Thr2517Ser | M                 | 1                  | 0   | 1   |
| BRCA2 | 15   | 7845+15         | A to G  | -          | IVS15+15A>G      | c.7617+15A>G         |              | IVS               | 1                  | 0   | 1   |
| BRCA2 | 15   | 7845+17         | C to T  | -          | IVS15+17C>T      | c.7617+17C>T         |              | IVS               | 1                  | 0   | 1   |
| BRCA2 | 16   | 7854            | G to A  | Thr to Thr | T2542T           | c.7626G>A            | p.=          | Syn               | 2                  | 0   | 2   |
| BRCA2 | 16   | 8033+6          | C to G  | -          | IVS16+6C>G       | c.7805+6C>G          |              | IVS               | 2                  | 1   | 1   |
| BRCA2 | 17   | 8034-40         | A to G  | -          | IVS16-40A>G      | c.7806-40A>G         |              | IVS               | 4                  | 1   | 3   |
| BRCA2 | 17   | 8034-39         | A to G  | -          | IVS16-39A>G      | c.7806-39A>G         |              | IVS               | 1                  | 1   | 0   |
| BRCA2 | 17   | 8034-14         | T to C  | -          | IVS16-14T>C      | c.7806-14T>C         |              | IVS               | 1122               | 391 | 731 |

| Gene  | Exon | NT <sup>1</sup> | Base Ch | AA Change  | BIC <sup>2</sup> | HGV <sup>3</sup> DNA | HGV protein  | Type <sup>4</sup> | Total <sup>5</sup> | CBC | UBC |
|-------|------|-----------------|---------|------------|------------------|----------------------|--------------|-------------------|--------------------|-----|-----|
| BRCA2 | 17   | 8106            | G to C  | Trp to Cys | W2626C           | c.7878G>C            | p.Trp2626Cys | M                 | 1                  | 1   | 0   |
| BRCA2 | 17   | 8107            | A to T  | Ile to Phe | I2627F           | c.7879A>T            | p.Ile2627Phe | M                 | 1                  | 0   | 1   |
| BRCA2 | 17   | 8142            | T to G  | Phe to Leu | F2638L           | c.7914T>G            | p.Phe2638Leu | M                 | 1                  | 0   | 1   |
| BRCA2 | 17   | 8204+35         | C to A  | -          | IVS17+35C>A      | c.7976+35C>A         |              | IVS               | 2                  | 0   | 2   |
| BRCA2 | 17   | 8204+36         | G to A  | -          | IVS17+36G>A      | c.7976+36G>A         |              | IVS               | 1                  | 0   | 1   |
| BRCA2 | 18   | 8216            | A to T  | Glu to Val | E2663V           | c.7988A>T            | p.Glu2663Val | M                 | 1                  | 0   | 1   |
| BRCA2 | 18   | 8222            | A to G  | Asp to Gly | D2665G           | c.7994A>G            | p.Asp2665Gly | M                 | 2                  | 1   | 1   |
| BRCA2 | 18   | 8255            | T to C  | Met to Thr | M2676T           | c.8027T>C            | p.Met2676Thr | M                 | 1                  | 0   | 1   |
| BRCA2 | 18   | 8267            | A to G  | Asp to Gly | D2680G           | c.8039A>G            | p.Asp2680Gly | M                 | 1                  | 0   | 1   |
| BRCA2 | 18   | 8318            | G to A  | Ser to Asn | S2697N           | c.8090G>A            | p.Ser2697Asn | M                 | 1                  | 1   | 0   |
| BRCA2 | 18   | 8362            | G to A  | Asp to Asn | D2712V           | c.8134G>A            | p.Asp2712Asn | M                 | 1                  | 1   | 0   |
| BRCA2 | 18   | 8377            | G to T  | Ala to Ser | A2717S           | c.8149G>T            | p.Ala2717Ser | M                 | 6                  | 3   | 3   |
| BRCA2 | 18   | 8410            | G to A  | Val to Ile | V2728I           | c.8182G>A            | p.Val2728Ile | M                 | 10                 | 2   | 8   |
| BRCA2 | 19   | 8688            | A to C  | Val to Val | V2820V           | c.8460A>C            | p.=          | Syn               | 7                  | 3   | 4   |
| BRCA2 | 20   | 8795            | A to C  | Glu to Ala | E2856A           | c.8567A>C            | p.Glu2856Ala | M                 | 15                 | 4   | 11  |
| BRCA2 | 20   | 8797            | G to A  | Ala to Thr | A2857T           | c.8569G>A            | p.Ala2857Thr | M                 | 1                  | 0   | 1   |
| BRCA2 | 20   | 8860+14         | T to C  | -          | IVS20+14T>C      | c.8632+14T>C         |              | IVS               | 1                  | 0   | 1   |
| BRCA2 | 20   | 8860+143        | insC    | -          | IVS20+143insC    | c.8632+143insC       |              | IVS               | 1                  | 1   | 0   |
| BRCA2 | 21   | 8861-16         | C to G  | -          | IVS20-16C>G      | c.8633-16C>G         |              | IVS               | 2                  | 0   | 2   |
| BRCA2 | 21   | 8875            | C to T  | Pro to Ser | P2883S           | c.8647C>T            | p.Pro2883Ser | M                 | 1                  | 0   | 1   |
| BRCA2 | 21   | 8982+75         | A to G  | -          | IVS21+75A>G      | c.8754+75A>G         |              | IVS               | 1                  | 0   | 1   |
| BRCA2 | 22   | 9058            | A to T  | Ile to Phe | I2944F           | c.8830A>T            | p.Ile2944Phe | M                 | 2                  | 1   | 1   |
| BRCA2 | 22   | 9078            | G to T  | Lys to Asn | K2950N           | c.8850G>T            | p.Lys2950Asn | M                 | 3                  | 3   | 0   |
| BRCA2 | 22   | 9079            | G to A  | Ala to Thr | A2951T           | c.8851G>A            | p.Ala2951Thr | M                 | 22                 | 10  | 12  |
| BRCA2 | 22   | 9130            | A to C  | Thr to Pro | T2968P           | c.8902A>C            | p.Thr2968Pro | M                 | 2                  | 1   | 1   |
| BRCA2 | 22   | 9133            | G to A  | Val to Met | V2969M           | c.8905G>A            | p.Val2969Met | M                 | 1                  | 0   | 1   |
| BRCA2 | 23   | 9332            | A to G  | Tyr to Cys | Y3035C           | c.9104A>G            | p.Tyr3035Cys | M                 | 2                  | 1   | 1   |
| BRCA2 | 24   | 9382            | C to T  | Arg to Trp | R3052W           | c.9154C>T            | p.Arg3052Trp | M                 | 1                  | 0   | 1   |
| BRCA2 | 24   | 9463            | G to A  | Val to Ile | V3079I           | c.9235G>A            | p.Val3079Ile | M                 | 1                  | 0   | 1   |
| BRCA2 | 24   | 9484+28         | del T   | -          | IVS24+28delT     | c.9256+28delT        |              | IVS               | 2                  | 2   | 0   |
| BRCA2 | 25   | 9485-113        | T to G  | -          | IVS24-113T>G     | c.9257-113T>G        |              | IVS               | 5                  | 0   | 5   |
| BRCA2 | 25   | 9485-110        | A to G  | -          | IVS24-110A>G     | c.9257-110A>G        |              | IVS               | 1                  | 0   | 1   |
| BRCA2 | 25   | 9485-83         | G to A  | -          | IVS24-83G>A      | c.9257-83G>A         |              | IVS               | 18                 | 8   | 10  |
| BRCA2 | 25   | 9485-49         | T to C  | -          | IVS24-49T>C      | c.9257-49T>C         |              | IVS               | 1                  | 1   | 0   |
| BRCA2 | 25   | 9485-16         | T to C  | -          | IVS24-16T>C      | c.9257-16T>C         |              | IVS               | 34                 | 8   | 26  |
| BRCA2 | 25   | 9520            | T to C  | Tyr to His | Y3098H           | c.9292T>C            | p.Tyr3098His | M                 | 1                  | 0   | 1   |
| BRCA2 | 25   | 9529            | C to T  | Leu to Leu | L3101L           | c.9301C>T            | p.=          | Syn               | 1                  | 0   | 1   |
| BRCA2 | 25   | 9594            | A to G  | Ala to Ala | A3122A           | c.9366A>G            | p.=          | Syn               | 1                  | 0   | 1   |

| Gene  | Exon | NT <sup>1</sup> | Base Ch   | AA Change   | BIC <sup>2</sup> | HGV <sup>3</sup> DNA | HGV protein  | Type <sup>4</sup> | Total <sup>5</sup> | CBC | UBC |
|-------|------|-----------------|-----------|-------------|------------------|----------------------|--------------|-------------------|--------------------|-----|-----|
| BRCA2 | 25   | 9639            | T to G    | Thr to Thr  | T3137T           | c.9411T>G            | p.=          | Syn               | 1                  | 1   | 0   |
| BRCA2 | 26   | 9741            | A to G    | Ile to Met  | I3171M           | c.9513A>G            | p.Ile3171Met | M                 | 1                  | 1   | 0   |
| BRCA2 | 26   | 9834            | G to C    | Pro to Pro  | P3202P           | c.9606G>C            | p.=          | Syn               | 1                  | 1   | 0   |
| BRCA2 | 26   | 9876+54         | G to A    | -           | IVS26+54G>A      | c.9648+54G>A         |              | IVS               | 2                  | 1   | 1   |
| BRCA2 | 26   | 9876+84         | G to A    | -           | IVS26+84G>A      | c.9648+84G>A         |              | IVS               | 12                 | 3   | 9   |
| BRCA2 | 26   | 9876+106        | del T     | -           | IVS26+106delT    | c.9648+106delT       |              | IVS               | 5                  | 2   | 3   |
| BRCA2 | 27   | 9877-67         | del TTAC  | -           | IVS26-67del4     | c.9649-67delTTAC     |              | IVS               | 1                  | 0   | 1   |
| BRCA2 | 27   | 9877-19         | G to A    | -           | IVS26-19G>A      | c.9649-19G>A         |              | IVS               | 2                  | 0   | 2   |
| BRCA2 | 27   | 9958            | G to A    | Val to Ile  | V3244I           | c.9730G>A            | p.Val3244Ile | M                 | 2                  | 1   | 1   |
| BRCA2 | 27   | 10103           | C to T    | Pro to Leu  | P3292L           | c.9875C>T            | p.Pro3292Leu | M                 | 1                  | 0   | 1   |
| BRCA2 | 27   | 10204           | A to T    | Lys to stop | K3326X           | c.9976A>T            | p.Lys3326X   | N                 | 40                 | 9   | 31  |
| BRCA2 | 27   | 10273           | A to G    | Thr to Ala  | T3349A           | c.10045A>G           | p.Thr3349Ala | M                 | 1                  | 0   | 1   |
|       |      |                 | del C ins |             |                  |                      |              |                   |                    |     |     |
| BRCA2 | 27   | 10323           | 11        | Stop 3369   | 10323delCins11   | c.10095delCins11     | p.Ser3366fs  | F                 | 2                  | 1   | 1   |
| BRCA2 | 27   | 10338           | G to A    | Arg to Arg  | R3370R           | c.10110G>A           | p.=          | Syn               | 8                  | 3   | 5   |
| BRCA2 | 27   | 10339           | A to G    | Thr to Ala  | T3371A           | c.10111A>G           | p.Thr3371Ala | M                 | 3                  | 0   | 3   |
| BRCA2 | 27   | 10378           | C to T    | Arg to Stop | R3384X           | c.10150C>T           | p.Arg3384X   | N                 | 1                  | 1   | 0   |
| BRCA2 | 27   | 10431           | G to A    | Thr to Thr  | T3401T           | c.10203G>A           | p.=          | Syn               | 1                  | 0   | 1   |
| BRCA2 | 27   | 10462           | A to G    | Ile to Val  | I3412V           | c.10234A>G           | p.Ile3412Val | M                 | 28                 | 10  | 18  |
| BRCA2 | 27   | 10516           | C to T    | 3' UTR      | UAA+31C>T        | c.*31C>T             |              | UTR               | 1                  | 0   | 1   |

<sup>1</sup> BRCA1: nucleotide number according to GenBank U14680.1. <http://www.ncbi.nlm.nih.gov/entrez/viewer.fcgi?db=nucleotide&val=555931>

<sup>1</sup> BRCA2: nucleotide number according to GenBank NM\_000059.1. <http://www.ncbi.nlm.nih.gov/entrez/viewer.fcgi?db=nucleotide&val=4502450>

<sup>2</sup> BIC (Breast Cancer Information Core). <http://research.nhgri.nih.gov/bic/>

<sup>3</sup> HGVS (Human Genome Variation Society). <http://www.hgvs.org/mutnomen/recs.html>

<sup>4</sup> Type: F=frame shift, M=missense, S=splice site, N=nonsense

<sup>5</sup> Number of observations

mutations not earlier described in BIC (by November 2008)





| Gene  | Exon | NT <sup>1</sup> | Base Ch | BIC <sup>2</sup> | Type <sup>3</sup> | AGVGD <sup>4</sup> Sea urchin |        |        | AGVGD Pufferfish |        |        | AGVGD Xenopus |        |        |
|-------|------|-----------------|---------|------------------|-------------------|-------------------------------|--------|--------|------------------|--------|--------|---------------|--------|--------|
|       |      |                 |         |                  |                   | Class <sup>5</sup>            | GV     | GD     | Class            | GV     | GD     | Class         | GV     | GD     |
| BRCA1 | 11   | 1256            | T to G  | I379M            | M                 | C0                            | 120.48 | 0.00   | C0               | 92.35  | 0.00   | C0            | 89.28  | 0.00   |
| BRCA1 | 11   | 1575            | T to C  | F486L            | M                 | C0                            | 225.33 | 0.00   | C0               | 212.92 | 0.00   | C0            | 212.92 | 0.00   |
| BRCA1 | 11   | 1605            | C to T  | R496C            | M                 | C0                            | 244.95 | 56.64  | C0               | 244.95 | 56.64  | C15           | 139.47 | 112.77 |
| BRCA1 | 11   | 1606            | G to A  | R496H            | M                 | C0                            | 244.95 | 0.00   | C0               | 244.95 | 0.00   | C0            | 139.47 | 0.00   |
| BRCA1 | 11   | 1728            | A to G  | N537D            | M                 | C0                            | 96.20  | 0.00   | C0               | 96.20  | 0.00   | C0            | 96.20  | 0.00   |
| BRCA1 | 11   | 1767            | A to C  | N550H            | M                 | C0                            | 151.68 | 0.00   | C0               | 118.33 | 4.81   | C0            | 79.79  | 26.81  |
| BRCA1 | 11   | 1831            | T to C  | I571T            | M                 | C0                            | 171.12 | 0.00   | C0               | 142.37 | 0.00   | C0            | 142.37 | 0.00   |
| BRCA1 | 11   | 1908            | G to A  | E597K            | M                 | C0                            | 152.38 | 0.00   | C0               | 152.38 | 0.00   | C0            | 128.69 | 0.00   |
| BRCA1 | 11   | 1965            | del TCT | S616del          | IFD               |                               |        |        |                  |        |        |               |        |        |
| BRCA1 | 11   | 1984            | C to T  | A622V            | M                 | C0                            | 224.84 | 2.03   | C0               | 224.84 | 2.03   | C0            | 224.84 | 2.03   |
| BRCA1 | 11   | 2030            | T to C  | T637T            | Syn               |                               |        |        |                  |        |        |               |        |        |
| BRCA1 | 11   | 2090            | A to G  | Q657Q            | Syn               |                               |        |        |                  |        |        |               |        |        |
| BRCA1 | 11   | 2196            | G to A  | D693N            | M                 | C0                            | 176.25 | 0.00   | C0               | 176.25 | 0.00   | C0            | 170.55 | 0.00   |
| BRCA1 | 11   | 2201            | C to T  | S694S            | Syn               |                               |        |        |                  |        |        |               |        |        |
| BRCA1 | 11   | 2418            | A to G  | S767G            | M                 | C0                            | 167.35 | 29.38  | C0               | 167.35 | 29.38  | C0            | 167.35 | 29.38  |
| BRCA1 | 11   | 2430            | T to C  | L771L            | Syn               |                               |        |        |                  |        |        |               |        |        |
| BRCA1 | 11   | 2471            | G to A  | S784S            | Syn               |                               |        |        |                  |        |        |               |        |        |
| BRCA1 | 11   | 2535            | G to A  | A806T            | M                 | C0                            | 254.20 | 0.00   | C0               | 254.20 | 0.00   | C0            | 155.03 | 0.00   |
| BRCA1 | 11   | 2577            | A to G  | K820E            | M                 | C0                            | 353.86 | 0.00   | C0               | 353.86 | 0.00   | C0            | 262.85 | 0.00   |
| BRCA1 | 11   | 2592            | G to T  | D825Y            | M                 | C0                            | 353.86 | 0.00   | C0               | 353.86 | 0.00   | C0            | 251.13 | 51.67  |
| BRCA1 | 11   | 2596            | C to A  | T826K            | M                 | C0                            | 353.86 | 0.00   | C0               | 353.86 | 0.00   | C0            | 215.31 | 73.23  |
| BRCA1 | 11   | 2602            | del GCT | G828del          | IFD               |                               |        |        |                  |        |        |               |        |        |
| BRCA1 | 11   | 2637            | A to G  | S840G            | M                 | C0                            | 144.64 | 28.37  | C0               | 144.64 | 28.37  | C0            | 123.92 | 28.37  |
| BRCA1 | 11   | 2640            | C to T  | R841W            | M                 | C15                           | 111.49 | 78.29  | C15              | 111.49 | 78.29  | C15           | 109.21 | 85.03  |
| BRCA1 | 11   | 2641            | G to A  | R841Q            | M                 | C0                            | 111.49 | 0.00   | C0               | 111.49 | 0.00   | C0            | 109.21 | 0.00   |
| BRCA1 | 11   | 2685            | T to C  | Y856H            | M                 | C0                            | 209.64 | 0.00   | C0               | 209.64 | 0.00   | C0            | 209.02 | 0.00   |
| BRCA1 | 11   | 2715            | C to T  | R866C            | M                 | C65                           | 0.00   | 179.53 | C65              | 0.00   | 179.53 | C65           | 0.00   | 179.53 |
| BRCA1 | 11   | 2727            | G to C  | A870P            | M                 | C0                            | 152.19 | 0.00   | C0               | 152.19 | 0.00   | C0            | 142.37 | 0.00   |
| BRCA1 | 11   | 2731            | C to T  | P871L            | M                 | C0                            | 97.78  | 0.00   | C0               | 97.78  | 0.00   | C0            | 97.78  | 0.00   |
| BRCA1 | 11   | 2847            | C to G  | Q910E            | M                 | C0                            | 170.63 | 16.18  | C0               | 145.16 | 16.18  | C0            | 124.29 | 16.18  |
| BRCA1 | 11   | 2852            | A to G  | G911G            | Syn               |                               |        |        |                  |        |        |               |        |        |
| BRCA1 | 11   | 2933            | A to G  | P938P            | Syn               |                               |        |        |                  |        |        |               |        |        |
| BRCA1 | 11   | 3003            | G to A  | E962K            | M                 | C0                            | 353.86 | 0.00   | C0               | 353.86 | 0.00   | C0            | 251.53 | 0.00   |
| BRCA1 | 11   | 3119            | G to A  | E1000E           | Syn               |                               |        |        |                  |        |        |               |        |        |
| BRCA1 | 11   | 3143            | G to A  | M1008I           | M                 | C0                            | 232.73 | 0.00   | C0               | 167.35 | 0.00   | C0            | 144.08 | 0.00   |
| BRCA1 | 11   | 3232            | A to G  | E1038G           | M                 | C0                            | 262.60 | 0.00   | C0               | 262.60 | 0.00   | C0            | 262.60 | 0.00   |

| Gene  | Exon | NT <sup>1</sup> | Base Ch | BIC <sup>2</sup> | Type <sup>3</sup> | AGVGD <sup>4</sup> Sea urchin |        |       | AGVGD Pufferfish |        |       | AGVGD Xenopus |        |       |
|-------|------|-----------------|---------|------------------|-------------------|-------------------------------|--------|-------|------------------|--------|-------|---------------|--------|-------|
|       |      |                 |         |                  |                   | Class <sup>5</sup>            | GV     | GD    | Class            | GV     | GD    | Class         | GV     | GD    |
| BRCA1 | 11   | 3238            | G to A  | S1040N           | M                 | C0                            | 247.33 | 0.00  | C0               | 247.33 | 0.00  | C0            | 222.77 | 2.03  |
| BRCA1 | 11   | 3340            | G to C  | R1074T           | M                 | C0                            | 353.86 | 0.00  | C0               | 353.86 | 0.00  | C0            | 353.86 | 0.00  |
| BRCA1 | 11   | 3415            | C to T  | P1099L           | M                 | C0                            | 244.61 | 50.17 | C0               | 244.61 | 50.17 | C0            | 209.54 | 94.04 |
| BRCA1 | 11   | 3421            | G to A  | S1101N           | M                 | C0                            | 276.16 | 0.00  | C0               | 276.16 | 0.00  | C0            | 276.16 | 0.00  |
| BRCA1 | 11   | 3535            | G to T  | S1139I           | M                 | C0                            | 220.50 | 74.79 | C0               | 220.50 | 74.79 | C15           | 90.49  | 89.28 |
| BRCA1 | 11   | 3537            | A to G  | S1140G           | M                 | C0                            | 353.86 | 0.00  | C0               | 353.86 | 0.00  | C0            | 251.59 | 0.00  |
| BRCA1 | 11   | 3573            | G to A  | D1152N           | M                 | C0                            | 202.97 | 0.00  | C0               | 195.29 | 0.00  | C0            | 195.29 | 0.00  |
| BRCA1 | 11   | 3667            | A to G  | K1183R           | M                 | C0                            | 165.50 | 0.00  | C0               | 165.50 | 0.00  | C0            | 145.74 | 0.00  |
| BRCA1 | 11   | 3719            | G to C  | Q1200H           | M                 | C0                            | 174.30 | 0.00  | C0               | 147.42 | 0.00  | C0            | 147.42 | 0.00  |
| BRCA1 | 11   | 3727            | G to A  | R1203Q           | M                 | C0                            | 126.59 | 0.00  | C0               | 57.03  | 0.00  | C0            | 57.03  | 0.00  |
| BRCA1 | 11   | 3827            | T to G  | N1236K           | M                 | C0                            | 241.85 | 0.00  | C0               | 217.19 | 63.83 | C25           | 46.24  | 93.76 |
| BRCA1 | 11   | 3836            | T to A  | S1239S           | Syn               |                               |        |       |                  |        |       |               |        |       |
| BRCA1 | 11   | 3864            | A to C  | T1249P           | M                 | C0                            | 255.91 | 0.00  | C0               | 254.20 | 0.00  | C0            | 134.03 | 0.00  |
| BRCA1 | 11   | 3916            | G to C  | S1266T           | M                 | C0                            | 227.23 | 6.47  | C0               | 217.79 | 8.22  | C0            | 82.67  | 8.47  |
| BRCA1 | 11   | 3942            | A to G  | I1275V           | M                 | C0                            | 261.33 | 0.00  | C0               | 261.33 | 0.00  | C0            | 153.36 | 0.00  |
| BRCA1 | 11   | 4158            | A to G  | R1347G           | M                 | C0                            | 353.86 | 0.00  | C0               | 353.86 | 0.00  | C0            | 253.50 | 0.00  |
| BRCA1 | 11   | 4166            | G to T  | T1349T           | Syn               |                               |        |       |                  |        |       |               |        |       |
| BRCA1 | 11   | 4215+3          | A to G  | IVS11+3A>G       | IVS               |                               |        |       |                  |        |       |               |        |       |
| BRCA1 | 11   | 4215+39         | T to C  | IVS11+39T>C      | IVS               |                               |        |       |                  |        |       |               |        |       |
| BRCA1 | 12   | 4216-28         | A to G  | IVS11-28A>G      | IVS               |                               |        |       |                  |        |       |               |        |       |
| BRCA1 | 12   | 4216-11         | T to C  | IVS11-11T>C      | IVS               |                               |        |       |                  |        |       |               |        |       |
| BRCA1 | 12   | 4230            | G to C  | G1371R           | M                 | C0                            | 231.75 | 41.54 | C0               | 231.75 | 41.54 | C0            | 112.66 | 42.00 |
| BRCA1 | 12   | 4291            | T to C  | I1391T           | M                 | C25                           | 30.92  | 69.84 | C25              | 30.92  | 69.84 | C65           | 4.86   | 89.28 |
| BRCA1 | 12   | 4304+20         | del 18  | IVS12+20del18    | IVS               |                               |        |       |                  |        |       |               |        |       |
| BRCA1 | 12   | 4304+21         | del TG  | IVS12+21delTG    | IVS               |                               |        |       |                  |        |       |               |        |       |
| BRCA1 | 12   | 4304+37         | del TG  | IVS12+37delTG    | IVS               |                               |        |       |                  |        |       |               |        |       |
| BRCA1 | 13   | 4427            | C to T  | S1436S           | Syn               |                               |        |       |                  |        |       |               |        |       |
| BRCA1 | 13   | 4476+17         | A to G  | IVS13+17A>G      | IVS               |                               |        |       |                  |        |       |               |        |       |
| BRCA1 | 14   | 4477-37         | G to A  | IVS13-37G>A      | IVS               |                               |        |       |                  |        |       |               |        |       |
| BRCA1 | 14   | 4477-28         | T to C  | IVS13-28T>C      | IVS               |                               |        |       |                  |        |       |               |        |       |
| BRCA1 | 14   | 4477-10         | C to T  | IVS13-10C>T      | IVS               |                               |        |       |                  |        |       |               |        |       |
| BRCA1 | 14   | 4529            | A to T  | E1470D           | M                 | C0                            | 105.70 | 0.00  | C0               | 61.81  | 44.60 | C0            | 61.81  | 44.60 |
| BRCA1 | 14   | 4603+14         | A to G  | IVS14+14A>G      | IVS               |                               |        |       |                  |        |       |               |        |       |
| BRCA1 | 14   | 4603+61         | G to T  | IVS14+61G>T      | IVS               |                               |        |       |                  |        |       |               |        |       |
| BRCA1 | 15   | 4654            | G to T  | S1512I           | M                 | C0                            | 180.63 | 62.93 | C0               | 180.63 | 62.93 | C0            | 180.63 | 62.93 |
| BRCA1 | 15   | 4755            | G to A  | D1546N           | M                 | C0                            | 353.86 | 0.00  | C0               | 353.86 | 0.00  | C0            | 353.86 | 0.00  |



| Gene  | Exon | NT <sup>1</sup> | Base Ch | BIC <sup>2</sup> | Type <sup>3</sup> | AGVGD <sup>4</sup> Sea urchin |        |       | AGVGD Pufferfish |        |       | AGVGD Xenopus |        |       |
|-------|------|-----------------|---------|------------------|-------------------|-------------------------------|--------|-------|------------------|--------|-------|---------------|--------|-------|
|       |      |                 |         |                  |                   | Class <sup>5</sup>            | GV     | GD    | Class            | GV     | GD    | Class         | GV     | GD    |
| BRCA2 | 5    | 654-37          | T to A  | IVS4-37T>A       | IVS               |                               |        |       |                  |        |       |               |        |       |
| BRCA2 | 5    | 661             | del GTT | V145del          | IFD               |                               |        |       |                  |        |       |               |        |       |
| BRCA2 | 5    | 683             | C to A  | T152K            | M                 | C0                            | 241.08 | 44.44 | C0               | 109.43 | 44.44 | C15           | 58.02  | 73.23 |
| BRCA2 | 5    | 695             | A to G  | D156G            | M                 | C0                            | 204.26 | 0.00  | C0               | 148.38 | 0.00  | C0            | 123.56 | 29.56 |
| BRCA2 | 6    | 744+21          | A to T  | IVS6+21A>T       | IVS               |                               |        |       |                  |        |       |               |        |       |
| BRCA2 | 6    | 744+54          | T to C  | IVS6+54T>C       | IVS               |                               |        |       |                  |        |       |               |        |       |
| BRCA2 | 6    | 744+58          | G to A  | IVS6+58G>A       | IVS               |                               |        |       |                  |        |       |               |        |       |
| BRCA2 | 7    | 745-19          | C to T  | IVS6-19C>T       | IVS               |                               |        |       |                  |        |       |               |        |       |
| BRCA2 | 7    | 823             | G to A  | A199T            | M                 | C0                            | 110.42 | 5.07  | C0               | 110.42 | 5.07  | C55           | 0.00   | 58.02 |
| BRCA2 | 7    | 859+25          | C to T  | IVS7+25C>T       | IVS               |                               |        |       |                  |        |       |               |        |       |
| BRCA2 | 8    | 860-69          | T to C  | IVS7-69T>C       | IVS               |                               |        |       |                  |        |       |               |        |       |
| BRCA2 | 8    | 860-64          | G to A  | IVS7-64G>A       | IVS               |                               |        |       |                  |        |       |               |        |       |
| BRCA2 | 8    | 860-27          | C to G  | IVS7-27C>G       | IVS               |                               |        |       |                  |        |       |               |        |       |
| BRCA2 | 9    | 910-32          | A to G  | IVS8-32A>G       | IVS               |                               |        |       |                  |        |       |               |        |       |
| BRCA2 | 9    | 910-12          | del TA  | IVS8-12delTA     | IVS               |                               |        |       |                  |        |       |               |        |       |
| BRCA2 | 9    | 997             | A to C  | N257H            | M                 | C0                            | 241.85 | 0.00  | C0               | 231.11 | 0.00  | C0            | 95.08  | 0.00  |
| BRCA2 | 10   | 1093            | A to C  | N289H            | M                 | C0                            | 164.97 | 0.00  | C0               | 146.96 | 0.00  | C0            | 85.11  | 5.07  |
| BRCA2 | 10   | 1184            | A to G  | N319S            | M                 | C0                            | 181.34 | 6.18  | C0               | 181.34 | 6.18  | C0            | 181.34 | 6.18  |
| BRCA2 | 10   | 1192            | A to C  | K322Q            | M                 | C0                            | 56.87  | 12.95 | C0               | 56.87  | 12.95 | C0            | 56.87  | 12.95 |
| BRCA2 | 10   | 1206            | C to A  | S326R            | M                 | C0                            | 184.79 | 19.25 | C0               | 135.90 | 70.92 | C0            | 135.90 | 70.92 |
| BRCA2 | 10   | 1261            | A to G  | K345E            | M                 | C0                            | 184.70 | 0.00  | C0               | 184.70 | 0.00  | C0            | 167.48 | 11.33 |
| BRCA2 | 10   | 1268            | A to G  | Q347R            | M                 | C0                            | 199.95 | 5.07  | C0               | 199.95 | 5.07  | C0            | 199.95 | 5.07  |
| BRCA2 | 10   | 1342            | A to C  | N372H            | M                 | C0                            | 246.50 | 0.00  | C0               | 242.39 | 0.00  | C0            | 106.33 | 0.00  |
| BRCA2 | 10   | 1379            | C to T  | S384F            | M                 | C0                            | 353.86 | 0.00  | C0               | 244.82 | 21.28 | C0            | 144.64 | 21.28 |
| BRCA2 | 10   | 1395            | G to A  | P389P            | Syn               |                               |        |       |                  |        |       |               |        |       |
| BRCA2 | 10   | 1460            | T to C  | I411T            | M                 | C0                            | 353.86 | 0.00  | C0               | 243.48 | 0.00  | C0            | 141.80 | 0.00  |
| BRCA2 | 10   | 1503            | A to G  | E425E            | Syn               |                               |        |       |                  |        |       |               |        |       |
| BRCA2 | 10   | 1590            | A to G  | K454K            | Syn               |                               |        |       |                  |        |       |               |        |       |
| BRCA2 | 10   | 1593            | A to G  | S455S            | Syn               |                               |        |       |                  |        |       |               |        |       |
| BRCA2 | 10   | 1613            | A to G  | E462G            | M                 | C0                            | 353.86 | 0.00  | C0               | 353.86 | 0.00  | C0            | 222.81 | 53.41 |
| BRCA2 | 10   | 1675            | G to C  | A483P            | M                 | C0                            | 353.86 | 0.00  | C0               | 244.82 | 0.00  | C0            | 144.64 | 0.00  |
| BRCA2 | 10   | 1688            | C to A  | A487E            | M                 | C0                            | 353.86 | 0.00  | C0               | 242.64 | 53.41 | C0            | 135.42 | 54.82 |
| BRCA2 | 10   | 1694            | C to G  | S489C            | M                 | C0                            | 353.86 | 0.00  | C0               | 266.79 | 11.33 | C0            | 186.88 | 92.04 |
| BRCA2 | 10   | 1700            | C to G  | T491S            | M                 | C0                            | 353.86 | 0.00  | C0               | 243.48 | 0.00  | C0            | 142.37 | 0.00  |
| BRCA2 | 10   | 1742            | T to C  | I505T            | M                 | C0                            | 353.86 | 0.00  | C0               | 353.86 | 0.00  | C0            | 258.32 | 0.00  |
| BRCA2 | 10   | 2014            | G to C  | D596H            | M                 | C0                            | 152.22 | 11.15 | C0               | 85.08  | 36.57 | C0            | 85.08  | 36.57 |

| Gene  | Exon | NT <sup>1</sup> | Base Ch | BIC <sup>2</sup> | Type <sup>3</sup> | AGVGD <sup>4</sup> Sea urchin |        |       | AGVGD Pufferfish |        |       | AGVGD Xenopus |        |       |
|-------|------|-----------------|---------|------------------|-------------------|-------------------------------|--------|-------|------------------|--------|-------|---------------|--------|-------|
|       |      |                 |         |                  |                   | Class <sup>5</sup>            | GV     | GD    | Class            | GV     | GD    | Class         | GV     | GD    |
| BRCA2 | 10   | 2016            | T to C  | D596D            | Syn               |                               |        |       |                  |        |       |               |        |       |
| BRCA2 | 10   | 2020            | A to G  | T598A            | M                 | C0                            | 170.63 | 0.00  | C0               | 167.89 | 0.00  | C0            | 144.64 | 0.00  |
| BRCA2 | 10   | 2032            | G to A  | G602R            | M                 | C0                            | 174.09 | 13.17 | C0               | 174.09 | 13.17 | C0            | 170.79 | 13.17 |
| BRCA2 | 10   | 2046            | G to A  | P606P            | Syn               |                               |        |       |                  |        |       |               |        |       |
| BRCA2 | 10   | 2117            | C to T  | T630I            | M                 | C0                            | 353.86 | 0.00  | C0               | 248.25 | 28.78 | C0            | 202.47 | 39.32 |
| BRCA2 | 10   | 2137+23         | ins T   | IVS10+23insT     | IVS               |                               |        |       |                  |        |       |               |        |       |
| BRCA2 | 11   | 2139            | T to C  | G637G            | Syn               |                               |        |       |                  |        |       |               |        |       |
| BRCA2 | 11   | 2166            | C to T  | S646S            | Syn               |                               |        |       |                  |        |       |               |        |       |
| BRCA2 | 11   | 2192            | C to G  | P655R            | M                 | C0                            | 353.86 | 0.00  | C0               | 353.86 | 0.00  | C0            | 261.33 | 13.17 |
| BRCA2 | 11   | 2310            | T to C  | N694N            | Syn               |                               |        |       |                  |        |       |               |        |       |
| BRCA2 | 11   | 2457            | T to C  | H743H            | Syn               |                               |        |       |                  |        |       |               |        |       |
| BRCA2 | 11   | 2578            | A to G  | M784V            | M                 | C0                            | 353.86 | 0.00  | C0               | 353.86 | 0.00  | C0            | 258.32 | 0.00  |
| BRCA2 | 11   | 2640            | A to G  | E804E            | Syn               |                               |        |       |                  |        |       |               |        |       |
| BRCA2 | 11   | 2778            | A to G  | Q850Q            | Syn               |                               |        |       |                  |        |       |               |        |       |
| BRCA2 | 11   | 2937            | A to G  | L903L            | Syn               |                               |        |       |                  |        |       |               |        |       |
| BRCA2 | 11   | 3031            | G to A  | D935N            | M                 | C0                            | 353.86 | 0.00  | C0               | 353.86 | 0.00  | C0            | 271.19 | 0.00  |
| BRCA2 | 11   | 3069            | G to T  | L947F            | M                 | C0                            | 353.86 | 0.00  | C0               | 353.86 | 0.00  | C0            | 353.86 | 0.00  |
| BRCA2 | 11   | 3111            | G to A  | Q961Q            | Syn               |                               |        |       |                  |        |       |               |        |       |
| BRCA2 | 11   | 3147            | G to A  | S973S            | Syn               |                               |        |       |                  |        |       |               |        |       |
| BRCA2 | 11   | 3185            | A to G  | N986S            | M                 | C0                            | 353.86 | 0.00  | C0               | 217.19 | 0.00  | C0            | 217.19 | 0.00  |
| BRCA2 | 11   | 3191            | A to C  | D988A            | M                 | C0                            | 353.86 | 0.00  | C0               | 276.16 | 0.00  | C0            | 276.16 | 0.00  |
| BRCA2 | 11   | 3199            | A to G  | N991D            | M                 | C0                            | 353.86 | 0.00  | C0               | 268.84 | 0.00  | C0            | 266.51 | 0.00  |
| BRCA2 | 11   | 3283            | C to G  | L1019V           | M                 | C0                            | 246.16 | 0.00  | C0               | 246.16 | 0.00  | C0            | 245.67 | 11.33 |
| BRCA2 | 11   | 3414            | T to C  | P1062P           | Syn               |                               |        |       |                  |        |       |               |        |       |
| BRCA2 | 11   | 3444            | A to G  | L1072L           | Syn               |                               |        |       |                  |        |       |               |        |       |
| BRCA2 | 11   | 3492            | T to C  | P1088P           | Syn               |                               |        |       |                  |        |       |               |        |       |
| BRCA2 | 11   | 3624            | A to G  | K1132K           | Syn               |                               |        |       |                  |        |       |               |        |       |
| BRCA2 | 11   | 3645            | G to A  | K1139K           | Syn               |                               |        |       |                  |        |       |               |        |       |
| BRCA2 | 11   | 3648            | T to C  | S1140S           | Syn               |                               |        |       |                  |        |       |               |        |       |
| BRCA2 | 11   | 3744            | G to A  | S1172S           | Syn               |                               |        |       |                  |        |       |               |        |       |
| BRCA2 | 11   | 3945            | A to G  | K1239K           | Syn               |                               |        |       |                  |        |       |               |        |       |
| BRCA2 | 11   | 4035            | T to C  | V1269V           | Syn               |                               |        |       |                  |        |       |               |        |       |
| BRCA2 | 11   | 4042            | A to G  | M1272V           | M                 | C0                            | 353.86 | 0.00  | C0               | 353.86 | 0.00  | C0            | 235.10 | 0.00  |
| BRCA2 | 11   | 4062            | T to C  | H1278H           | Syn               |                               |        |       |                  |        |       |               |        |       |
| BRCA2 | 11   | 4076            | T to C  | V1283A           | M                 | C0                            | 353.86 | 0.00  | C0               | 353.86 | 0.00  | C0            | 246.16 | 35.60 |
| BRCA2 | 11   | 4097            | G to A  | C1290Y           | M                 | C0                            | 353.86 | 0.00  | C0               | 353.86 | 0.00  | C0            | 248.25 | 53.70 |

| Gene  | Exon | NT <sup>1</sup> | Base Ch | BIC <sup>2</sup> | Type <sup>3</sup> | AGVGD <sup>4</sup> Sea urchin |        |        | AGVGD Pufferfish |        |        | AGVGD Xenopus |        |        |
|-------|------|-----------------|---------|------------------|-------------------|-------------------------------|--------|--------|------------------|--------|--------|---------------|--------|--------|
|       |      |                 |         |                  |                   | Class <sup>5</sup>            | GV     | GD     | Class            | GV     | GD     | Class         | GV     | GD     |
| BRCA2 | 11   | 4144            | G to A  | V1306I           | M                 | C0                            | 353.86 | 0.00   | C0               | 240.36 | 0.00   | C0            | 96.19  | 0.00   |
| BRCA2 | 11   | 4289            | C to T  | T1354M           | M                 | C0                            | 353.86 | 0.00   | C0               | 353.86 | 0.00   | C0            | 246.14 | 46.93  |
| BRCA2 | 11   | 4296            | G to A  | L1356L           | Syn               |                               |        |        |                  |        |        |               |        |        |
| BRCA2 | 11   | 4318            | A to C  | I1364L           | M                 | C0                            | 353.86 | 0.00   | C0               | 353.86 | 0.00   | C0            | 260.21 | 4.86   |
| BRCA2 | 11   | 4415            | A to G  | Q1396R           | M                 | C0                            | 353.86 | 0.00   | C0               | 233.41 | 39.51  | C0            | 107.73 | 39.51  |
| BRCA2 | 11   | 4452            | G to A  | Q1408Q           | Syn               |                               |        |        |                  |        |        |               |        |        |
| BRCA2 | 11   | 4469            | C to T  | T1414M           | M                 | C0                            | 261.51 | 0.00   | C0               | 261.51 | 0.00   | C0            | 261.51 | 0.00   |
| BRCA2 | 11   | 4486            | G to T  | D1420Y           | M                 | C0                            | 119.25 | 62.47  | C0               | 119.25 | 62.47  | C15           | 87.36  | 87.67  |
| BRCA2 | 11   | 4587            | A to G  | K1453K           | Syn               |                               |        |        |                  |        |        |               |        |        |
| BRCA2 | 11   | 4664            | G to C  | S1479T           | M                 | C0                            | 254.15 | 0.00   | C0               | 254.15 | 0.00   | C0            | 244.14 | 0.00   |
| BRCA2 | 11   | 4789            | C to T  | L1521L           | Syn               |                               |        |        |                  |        |        |               |        |        |
| BRCA2 | 11   | 4791            | G to A  | L1521L           | Syn               |                               |        |        |                  |        |        |               |        |        |
| BRCA2 | 11   | 4813            | G to A  | G1529R           | M                 | C65                           | 0.00   | 125.13 | C65              | 0.00   | 125.13 | C65           | 0.00   | 125.13 |
| BRCA2 | 11   | 4842            | T to C  | S1538S           | Syn               |                               |        |        |                  |        |        |               |        |        |
| BRCA2 | 11   | 4909            | C to A  | H1561N           | M                 | C0                            | 181.60 | 0.00   | C0               | 165.75 | 0.00   | C0            | 165.75 | 0.00   |
| BRCA2 | 11   | 4995            | A to G  | P1589P           | Syn               |                               |        |        |                  |        |        |               |        |        |
| BRCA2 | 11   | 5042            | T to C  | V1605A           | M                 | C0                            | 244.82 | 0.00   | C0               | 144.08 | 1.01   | C0            | 144.08 | 1.01   |
| BRCA2 | 11   | 5058            | G to A  | V1610V           | Syn               |                               |        |        |                  |        |        |               |        |        |
| BRCA2 | 11   | 5093            | G to C  | R1622T           | M                 | C0                            | 353.86 | 0.00   | C0               | 353.86 | 0.00   | C0            | 353.86 | 0.00   |
| BRCA2 | 11   | 5155            | G to A  | V1643I           | M                 | C0                            | 353.86 | 0.00   | C0               | 353.86 | 0.00   | C0            | 242.23 | 0.00   |
| BRCA2 | 11   | 5248            | A to G  | S1674G           | M                 | C0                            | 138.80 | 0.00   | C0               | 138.80 | 0.00   | C0            | 138.80 | 0.00   |
| BRCA2 | 11   | 5279            | C to G  | T1684S           | M                 | C0                            | 171.12 | 0.00   | C0               | 142.37 | 0.00   | C0            | 103.68 | 0.00   |
| BRCA2 | 11   | 5419            | C to T  | H1731Y           | M                 | C0                            | 353.86 | 0.00   | C0               | 353.86 | 0.00   | C0            | 231.11 | 63.24  |
| BRCA2 | 11   | 5426            | C to T  | S1733F           | M                 | C0                            | 353.86 | 0.00   | C15              | 209.54 | 110.53 | C15           | 99.44  | 110.53 |
| BRCA2 | 11   | 5427            | C to T  | S1733S           | Syn               |                               |        |        |                  |        |        |               |        |        |
| BRCA2 | 11   | 5547            | G to A  | E1773E           | Syn               |                               |        |        |                  |        |        |               |        |        |
| BRCA2 | 11   | 5606            | A to G  | N1793S           | M                 | C0                            | 353.86 | 0.00   | C0               | 353.86 | 0.00   | C0            | 353.86 | 0.00   |
| BRCA2 | 11   | 5646            | A to G  | E1806E           | Syn               |                               |        |        |                  |        |        |               |        |        |
| BRCA2 | 11   | 5723            | C to A  | S1832Y           | M                 | C0                            | 353.86 | 0.00   | C0               | 353.86 | 0.00   | C0            | 257.76 | 12.16  |
| BRCA2 | 11   | 5806            | A to G  | K1860E           | M                 | C0                            | 246.80 | 16.18  | C0               | 244.26 | 16.18  | C0            | 244.26 | 16.18  |
| BRCA2 | 11   | 5862            | C to G  | N1878K           | M                 | C0                            | 262.60 | 0.00   | C0               | 170.08 | 0.00   | C0            | 170.08 | 0.00   |
| BRCA2 | 11   | 5863            | G to A  | E1879K           | M                 | C0                            | 98.18  | 0.00   | C0               | 61.81  | 0.00   | C0            | 61.81  | 0.00   |
| BRCA2 | 11   | 5868            | T to G  | N1880K           | M                 | C0                            | 112.83 | 34.69  | C0               | 112.83 | 34.69  | C0            | 111.88 | 36.71  |
| BRCA2 | 11   | 5887            | A to G  | T1887A           | M                 | C0                            | 353.86 | 0.00   | C0               | 255.29 | 0.00   | C0            | 144.99 | 0.00   |
| BRCA2 | 11   | 5896            | A to G  | M1890V           | M                 | C0                            | 353.86 | 0.00   | C0               | 353.86 | 0.00   | C0            | 236.57 | 0.00   |
| BRCA2 | 11   | 5911            | G to A  | E1895K           | M                 | C0                            | 353.86 | 0.00   | C0               | 276.16 | 0.00   | C0            | 176.53 | 0.00   |

| Gene  | Exon | NT <sup>1</sup> | Base Ch | BIC <sup>2</sup> | Type <sup>3</sup> | AGVGD <sup>4</sup> Sea urchin |        |       | AGVGD Pufferfish |        |       | AGVGD Xenopus |        |       |
|-------|------|-----------------|---------|------------------|-------------------|-------------------------------|--------|-------|------------------|--------|-------|---------------|--------|-------|
|       |      |                 |         |                  |                   | Class <sup>5</sup>            | GV     | GD    | Class            | GV     | GD    | Class         | GV     | GD    |
| BRCA2 | 11   | 5932            | G to A  | D1902N           | M                 | C0                            | 353.86 | 0.00  | C0               | 353.86 | 0.00  | C0            | 213.16 | 22.75 |
| BRCA2 | 11   | 5972            | C to T  | T1915M           | M                 | C0                            | 353.86 | 0.00  | C0               | 258.55 | 0.00  | C0            | 162.56 | 0.00  |
| BRCA2 | 11   | 5996            | A to C  | D1923A           | M                 | C0                            | 353.86 | 0.00  | C0               | 251.13 | 0.00  | C0            | 158.16 | 1.52  |
| BRCA2 | 11   | 6013            | A to G  | I1929V           | M                 | C0                            | 353.86 | 0.00  | C0               | 353.86 | 0.00  | C0            | 242.23 | 0.00  |
| BRCA2 | 11   | 6107            | G to A  | C1960Y           | M                 | C0                            | 353.86 | 0.00  | C0               | 255.29 | 4.05  | C0            | 225.33 | 4.05  |
| BRCA2 | 11   | 6172            | A to G  | S1982G           | M                 | C0                            | 46.24  | 50.15 | C0               | 46.24  | 50.15 | C0            | 46.24  | 50.15 |
| BRCA2 | 11   | 6328            | C to T  | R2034C           | M                 | C0                            | 353.86 | 0.00  | C0               | 353.86 | 0.00  | C0            | 262.81 | 11.33 |
| BRCA2 | 11   | 6347            | T to A  | I2040K           | M                 | C0                            | 353.86 | 0.00  | C0               | 353.86 | 0.00  | C0            | 353.86 | 0.00  |
| BRCA2 | 11   | 6545            | T to C  | L2106P           | M                 | C0                            | 353.86 | 0.00  | C0               | 353.86 | 0.00  | C0            | 251.03 | 0.00  |
| BRCA2 | 11   | 6550            | C to T  | R2108C           | M                 | C0                            | 353.86 | 0.00  | C0               | 353.86 | 0.00  | C0            | 267.27 | 0.00  |
| BRCA2 | 11   | 6551            | G to A  | R2108H           | M                 | C0                            | 353.86 | 0.00  | C0               | 353.86 | 0.00  | C0            | 267.27 | 0.00  |
| BRCA2 | 11   | 6575            | A to G  | H2116R           | M                 | C0                            | 353.86 | 0.00  | C0               | 258.33 | 1.62  | C0            | 116.00 | 1.62  |
| BRCA2 | 11   | 6640            | G to T  | V2138F           | M                 | C0                            | 261.33 | 21.28 | C0               | 261.33 | 21.28 | C0            | 261.33 | 21.28 |
| BRCA2 | 11   | 6683            | C to A  | S2152Y           | M                 | C0                            | 226.57 | 85.34 | C0               | 215.31 | 85.34 | C15           | 76.97  | 92.25 |
| BRCA2 | 11   | 6693            | C to T  | L2155L           | Syn               |                               |        |       |                  |        |       |               |        |       |
| BRCA2 | 11   | 6717            | A to G  | Q2163Q           | Syn               |                               |        |       |                  |        |       |               |        |       |
| BRCA2 | 11   | 6741            | C to G  | V2171V           | Syn               |                               |        |       |                  |        |       |               |        |       |
| BRCA2 | 11   | 6841            | G to A  | V2205M           | M                 | C0                            | 353.86 | 0.00  | C0               | 238.68 | 0.00  | C0            | 134.86 | 0.00  |
| BRCA2 | 11   | 6976            | A to G  | T2250A           | M                 | C0                            | 152.38 | 0.00  | C0               | 114.06 | 0.00  | C0            | 114.06 | 0.00  |
| BRCA2 | 11   | 7049            | G to T  | G2274V           | M                 | C0                            | 257.76 | 0.00  | C0               | 160.70 | 0.00  | C0            | 160.70 | 0.00  |
| BRCA2 | 11   | 7069+11         | A to G  | IVS11+11A>G      | IVS               |                               |        |       |                  |        |       |               |        |       |
| BRCA2 | 11   | 7069+33         | A to G  | IVS11+33A>G      | IVS               |                               |        |       |                  |        |       |               |        |       |
| BRCA2 | 11   | 7069+36         | A to G  | IVS11+36A>G      | IVS               |                               |        |       |                  |        |       |               |        |       |
| BRCA2 | 12   | 7070-73         | T to A  | IVS11-73T>A      | IVS               |                               |        |       |                  |        |       |               |        |       |
| BRCA2 | 12   | 7070-22         | T to A  | IVS11-22T>A      | IVS               |                               |        |       |                  |        |       |               |        |       |
| BRCA2 | 12   | 7081            | A to G  | I2285V           | M                 | C0                            | 35.68  | 26.34 | C15              | 4.86   | 28.68 | C25           | 0.00   | 28.68 |
| BRCA2 | 12   | 7149            | A to G  | S2307S           | Syn               |                               |        |       |                  |        |       |               |        |       |
| BRCA2 | 13   | 7171            | A to C  | I2315L           | M                 | C0                            | 109.50 | 0.00  | C0               | 109.50 | 0.00  | C0            | 109.50 | 0.00  |
| BRCA2 | 13   | 7235+4          | A to G  | IVS13+4A>G       | IVS               |                               |        |       |                  |        |       |               |        |       |
| BRCA2 | 13   | 7235+52         | C to A  | IVS13+52C>A      | IVS               |                               |        |       |                  |        |       |               |        |       |
| BRCA2 | 14   | 7236-62         | A to G  | IVS13-62A>G      | IVS               |                               |        |       |                  |        |       |               |        |       |
| BRCA2 | 14   | 7245            | G to C  | K2339N           | M                 | C0                            | 248.62 | 0.00  | C0               | 96.44  | 28.61 | C0            | 96.44  | 28.61 |
| BRCA2 | 14   | 7275            | T to A  | F2349L           | M                 | C0                            | 261.25 | 0.00  | C0               | 124.40 | 0.00  | C0            | 108.52 | 0.00  |
| BRCA2 | 14   | 7280            | C to G  | A2351G           | M                 | C0                            | 251.03 | 0.00  | C0               | 154.93 | 28.37 | C0            | 154.93 | 28.37 |
| BRCA2 | 14   | 7285            | G to C  | G2353R           | M                 | C0                            | 251.53 | 5.07  | C0               | 170.54 | 5.07  | C0            | 170.54 | 5.07  |
| BRCA2 | 14   | 7378            | C to A  | Q2384K           | M                 | C0                            | 353.86 | 0.00  | C0               | 266.79 | 0.00  | C0            | 263.90 | 0.00  |







| Gene  | Exon | NT <sup>1</sup> | Base Ch | BIC <sup>2</sup> | Type <sup>3</sup> | AGVGD <sup>4</sup> Sea urchin |        |      | AGVGD Pufferfish |        |      | AGVGD Xenopus |        |      |
|-------|------|-----------------|---------|------------------|-------------------|-------------------------------|--------|------|------------------|--------|------|---------------|--------|------|
|       |      |                 |         |                  |                   | Class <sup>5</sup>            | GV     | GD   | Class            | GV     | GD   | Class         | GV     | GD   |
| BRCA2 | 27   | 10462           | A to G  | I3412V           | M                 | C0                            | 353.86 | 0.00 | C0               | 353.86 | 0.00 | C0            | 244.82 | 0.00 |
| BRCA2 | 27   | 10516           | C to T  | UTR              | UTR               |                               |        |      |                  |        |      |               |        |      |

<sup>1</sup> BRCA1: nucleotide number according to GenBank U14680.1. <http://www.ncbi.nlm.nih.gov/entrez/viewer.fcgi?db=nucleotide&val=555931>

<sup>1</sup> BRCA2: nucleotide number according to GenBank NM\_000059.1. <http://www.ncbi.nlm.nih.gov/entrez/viewer.fcgi?db=nucleotide&val=4502450>

<sup>2</sup> BIC (Breast Cancer Information Core). <http://research.nhgri.nih.gov/bic/>. HGVS nomenclature in Supp. Table S2.

<sup>3</sup> Type: F=frame shift, M=missense, N=nonsense, Syn=Synonymous, IFD=in frame deletion, IVS=intervening sequence, UTR=untranslated region

<sup>4</sup> Align Grantham Variation and Grantham Deviation (AGVGD) scores (of October 2008) <http://agvgd.iarc.fr>, aligned down to sea urchin (*Strongylocentrotus purpuratus*), pufferfish (*Tetraodon nigroviridis*) or frog (*Xenopus laevis*)

<sup>5</sup> A-GVGD graded classifiers, ordered from most likely to interfere with function to least likely:

|                                                                                   |                                                                                                  |
|-----------------------------------------------------------------------------------|--------------------------------------------------------------------------------------------------|
|  | $GD \geq 65 + \tan(10) \times (GV^{2.5}) \Rightarrow$ Class C65 $\Leftrightarrow$ most likely    |
|  | $GD \geq 55 + \tan(10) \times (GV^{2.0}) \Rightarrow$ Class C55                                  |
|  | $GD \geq 45 + \tan(15) \times (GV^{1.7}) \Rightarrow$ Class C45                                  |
|  | $GD \geq 35 + \tan(50) \times (GV^{1.1}) \Rightarrow$ Class C35                                  |
|  | $GD \geq 25 + \tan(55) \times (GV^{0.95}) \Rightarrow$ Class C25                                 |
|  | $GD \geq 15 + \tan(75) \times (GV^{0.6}) \Rightarrow$ Class C15                                  |
|                                                                                   | Else ( $GD < 15 + \tan(75) \times (GV^{0.6}) \Rightarrow$ Class C0 $\Leftrightarrow$ less likely |
